# Supplementary material for: Aqua-friendly organometallic Ir–Pt complexes: pH-responsive AIPE-guided imaging of bacterial cells
Source: Royal Society of Chemistry journal article supplement (doi:10.1039/d2dt03390a), 2023-01-01
Supplement: d2dt03390a1.pdf [file d2dt03390a1.pdf]

## Supporting Information

### Aqua-friendly organometallic Ir-Pt complexes: pH responsive AIPE guided imaging of bacterial cells

Sakira Tabassum Borah,<sup>1</sup> Bishnu Das,<sup>1</sup> Prakash Biswas,<sup>2</sup> Amirul I Mallik<sup>2\*</sup> and Parna Gupta<sup>1\*</sup>

*Indian Institute of Science Education and Research Kolkata, Mohanpur, West Bengal 741246, India*

<sup>1</sup>*Department of Chemical Sciences*

<sup>2</sup>*Department of Biological Sciences*

#### Table of Contents

|                                                                                                                                                                                  |
|----------------------------------------------------------------------------------------------------------------------------------------------------------------------------------|
| <b>Figure S1:</b> ESI-MS spectra of L, Ir1, Ir2, Ir3, Ir1Pt, Ir2Pt and Ir3Pt                                                                                                     |
| <b>Figure S2:</b> NMR spectra of L, Ir1, Ir2, Ir3, Ir1Pt, Ir2Pt and Ir3Pt<br>A. <sup>1</sup> H NMR Spectra<br>B. <sup>13</sup> C NMR Spectra<br>C. <sup>195</sup> Pt NMR Spectra |
| <b>Figure S3:</b> Geometry optimized structure of Ir1, Ir2, Ir3, Ir1Pt, Ir2Pt and Ir3Pt                                                                                          |
| <b>Figure S4:</b> The overlaid absorption spectral profile of experimental and theoretical data                                                                                  |
| <b>Table S1:</b> Frontier orbital diagram of complexes Ir1, Ir2, Ir3, Ir1Pt, Ir2Pt and Ir3Pt                                                                                     |
| <b>Figure S5:</b> Temperature dependent (290 – 80 K) emission spectra of Ir1 -Ir3, Ir1Pt -Ir3Pt in solution and solid state                                                      |
| <b>Figure S6:</b> Concentration dependent AIE of Ir1Pt – Ir3Pt                                                                                                                   |
| <b>Figure S7:</b> Toxicity of Ir1Pt, Ir2Pt & Ir3Pt on <i>E. coli</i> (DH5α)                                                                                                      |
| <b>Figure S8:</b> Agar well diffusion assay using<br>A. mononuclear<br>B. dinuclear complexes                                                                                    |

Figure S1: ESI-MS spectra

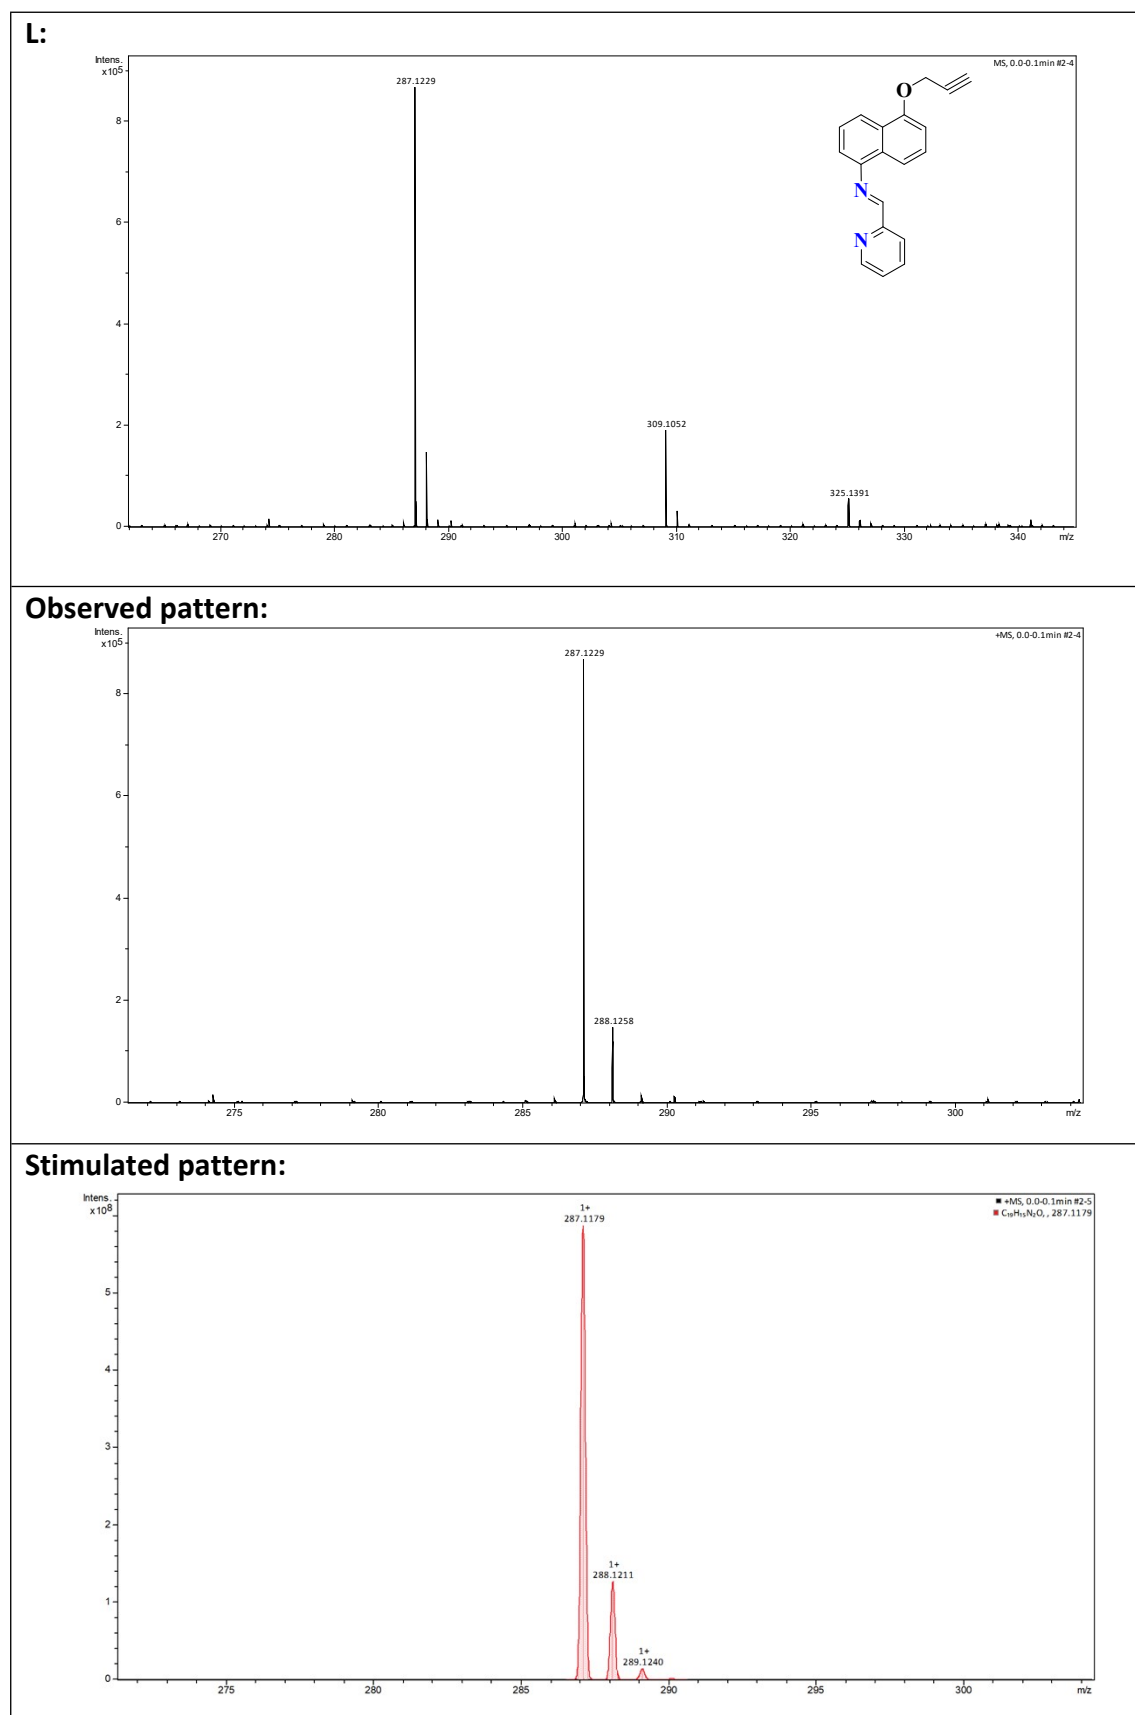

Ir1:

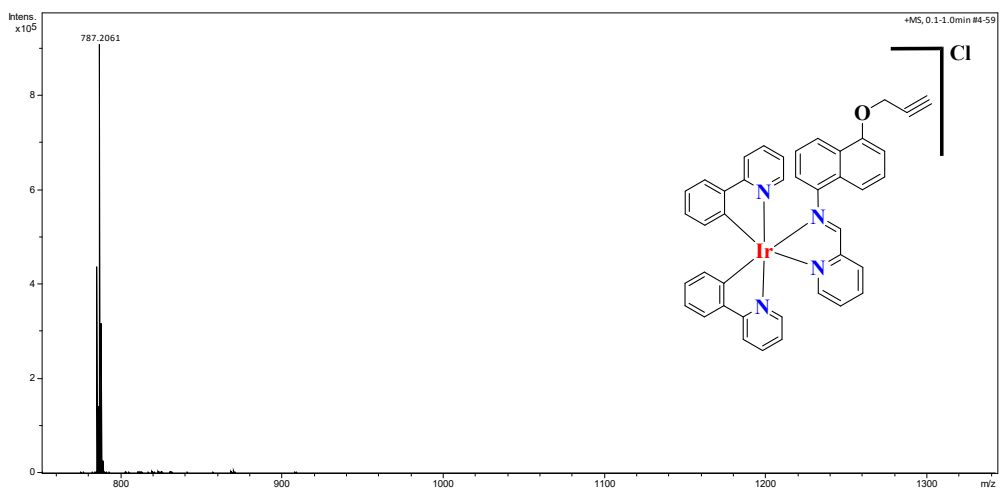

Observed pattern:

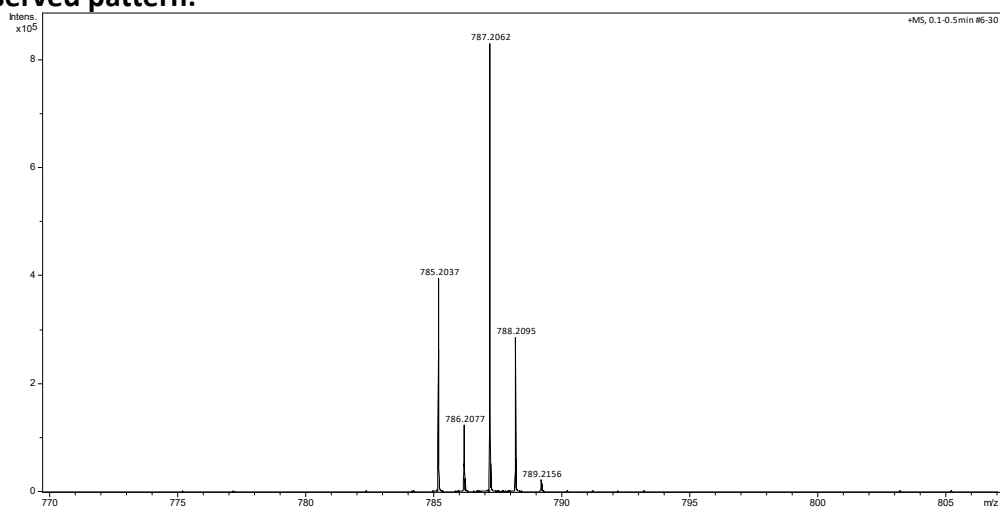

Stimulated pattern:

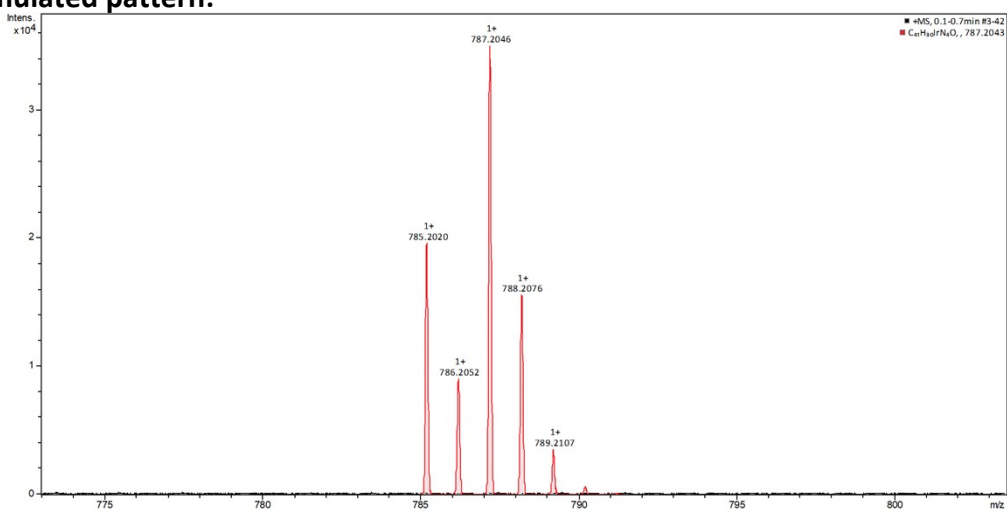

Ir2:

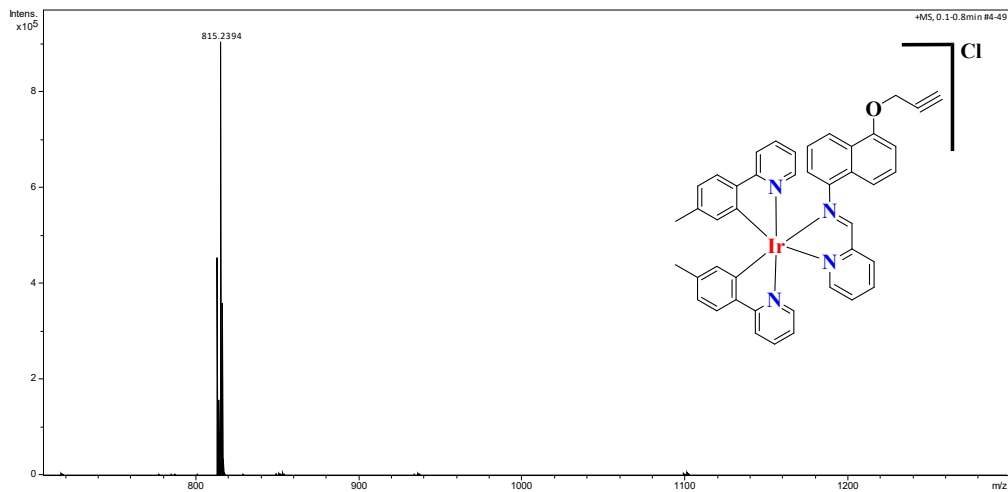

Observed pattern:

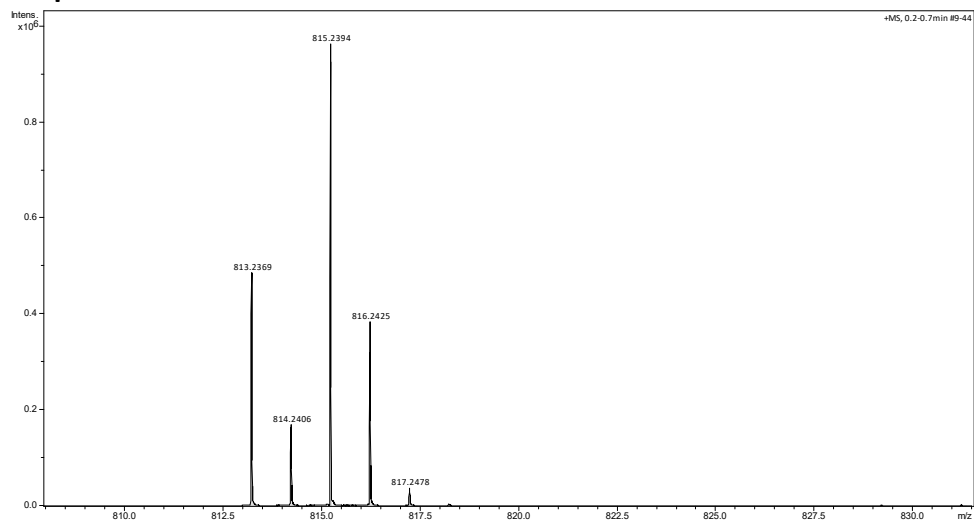

Stimulated pattern:

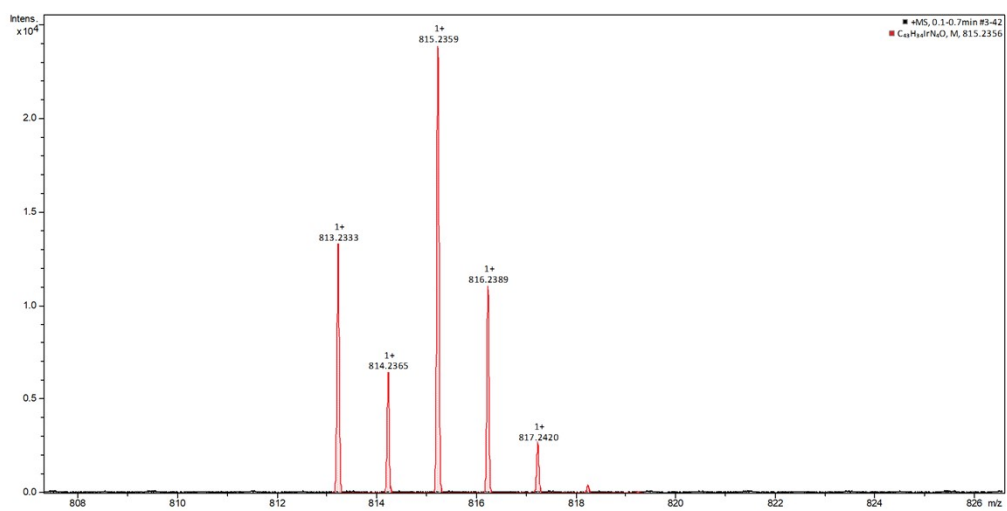

### Ir3:

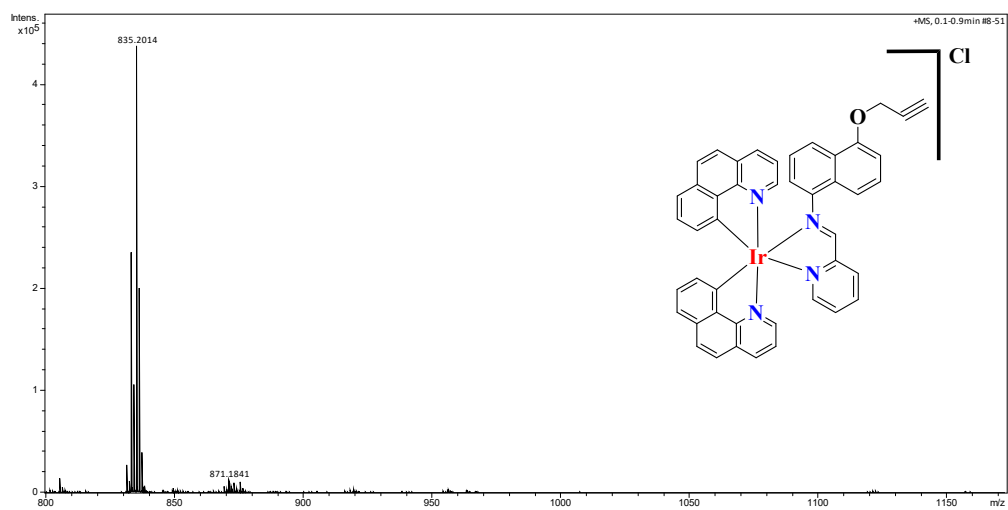

### Observed pattern:

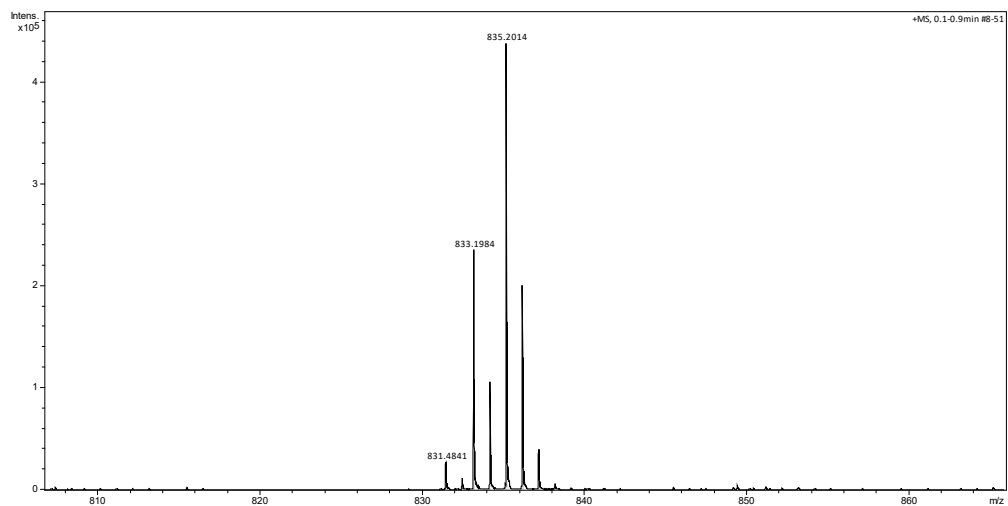

### Stimulated pattern:

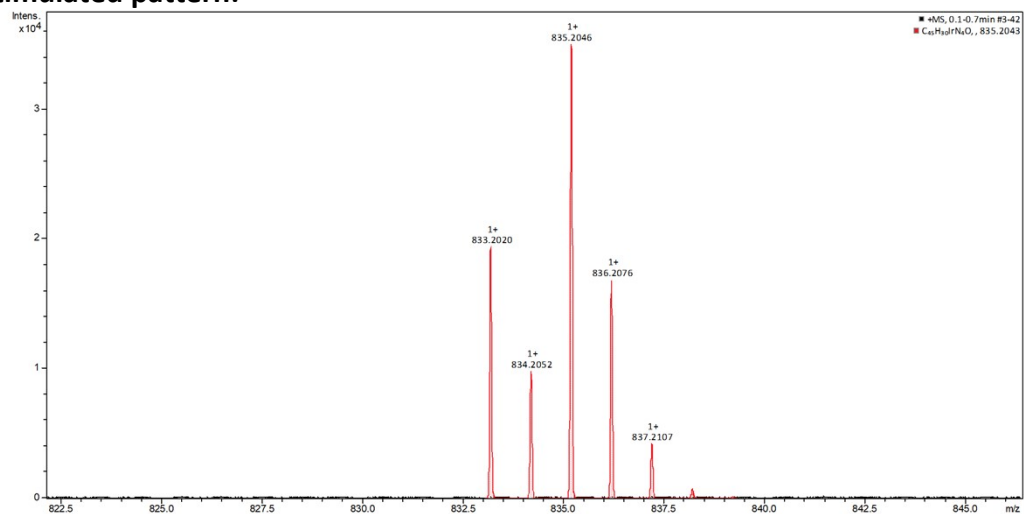

### Ir1Pt:

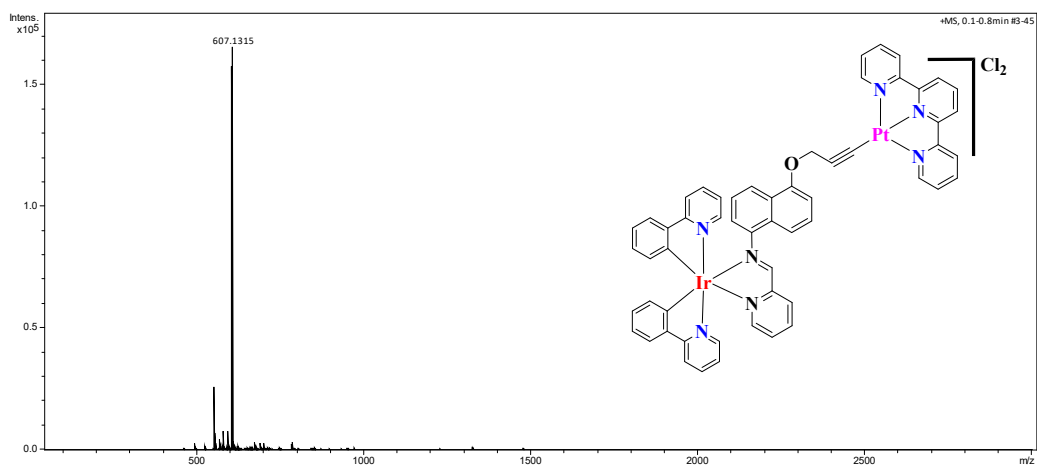

### Observed pattern:

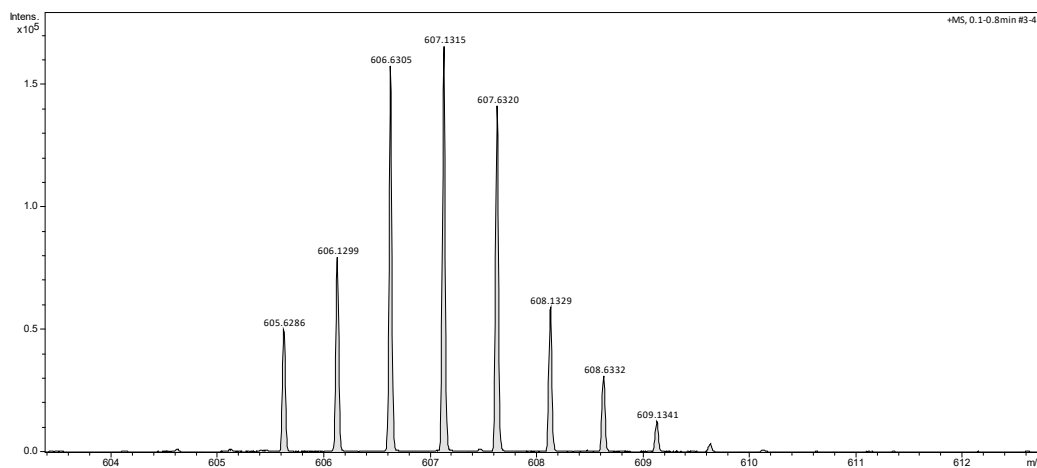

### Stimulated pattern:

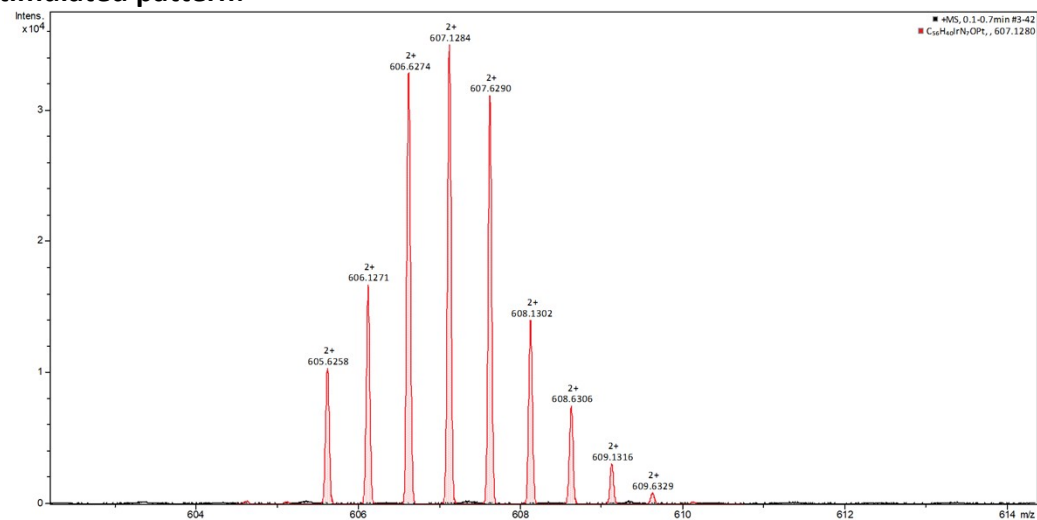

### Ir2Pt:

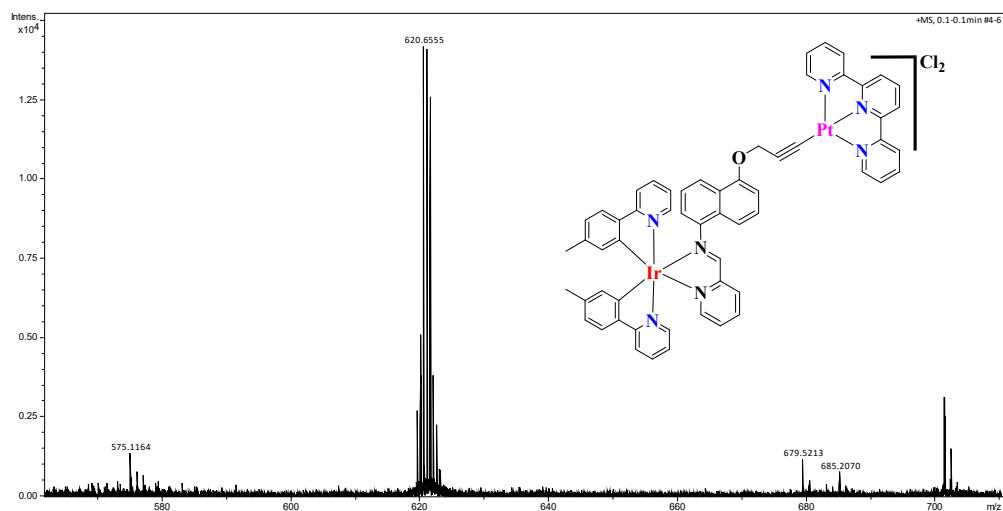

### Observed pattern:

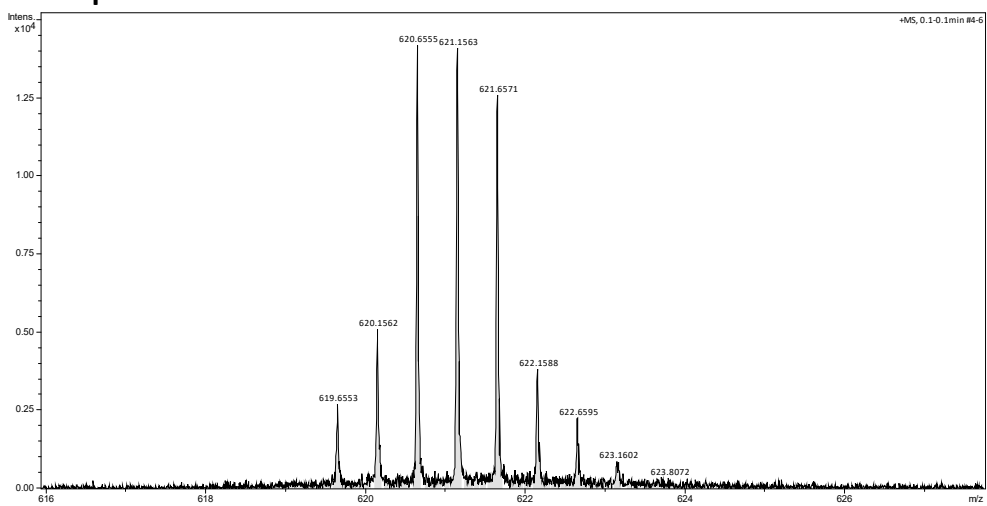

### Stimulated pattern:

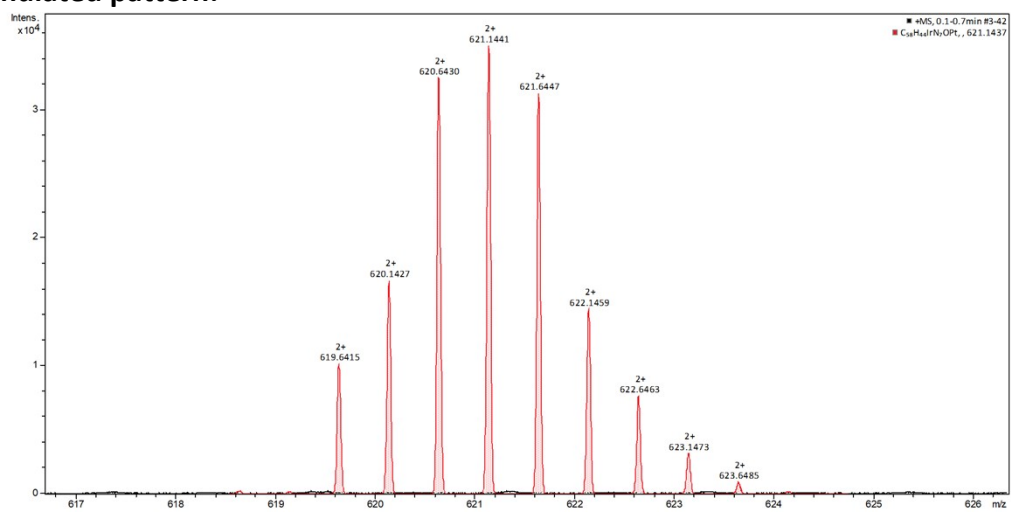

### Ir3Pt:

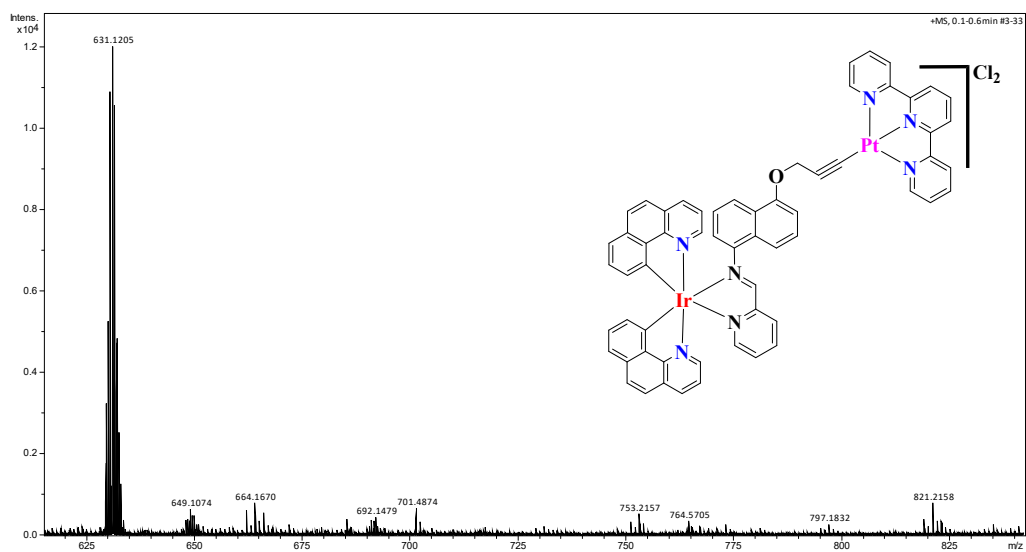

### Observed pattern:

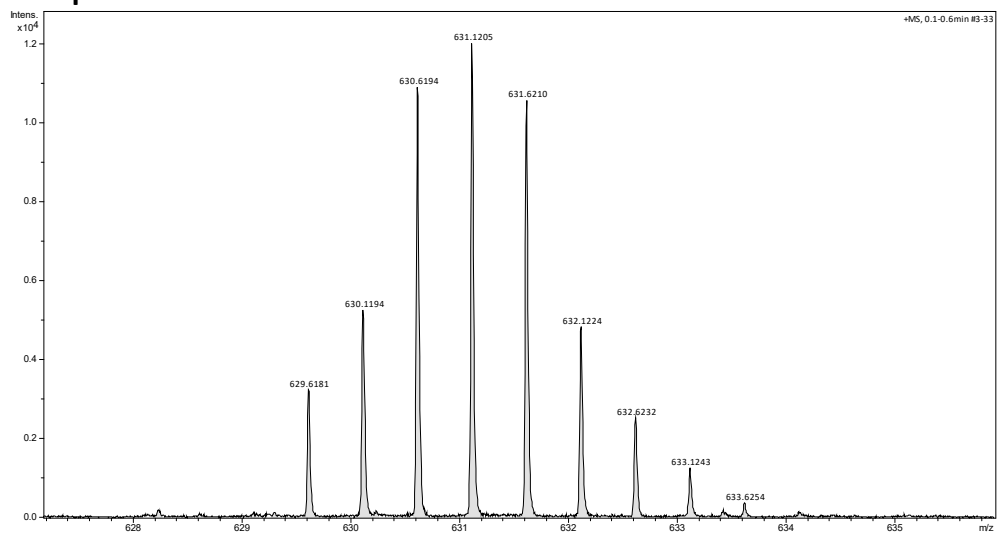

### Stimulated pattern:

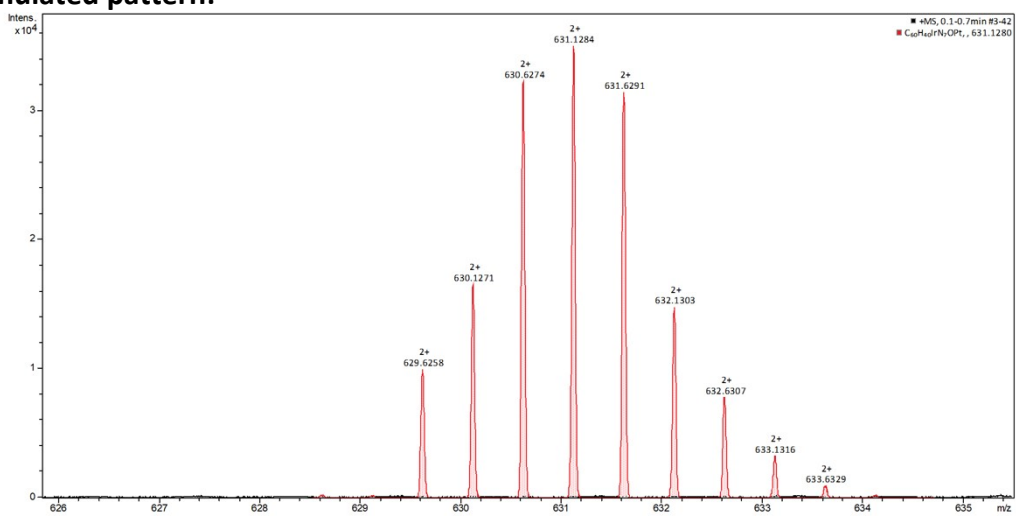



Figure S2: NMR spectra

A. <sup>1</sup>H NMR spectra

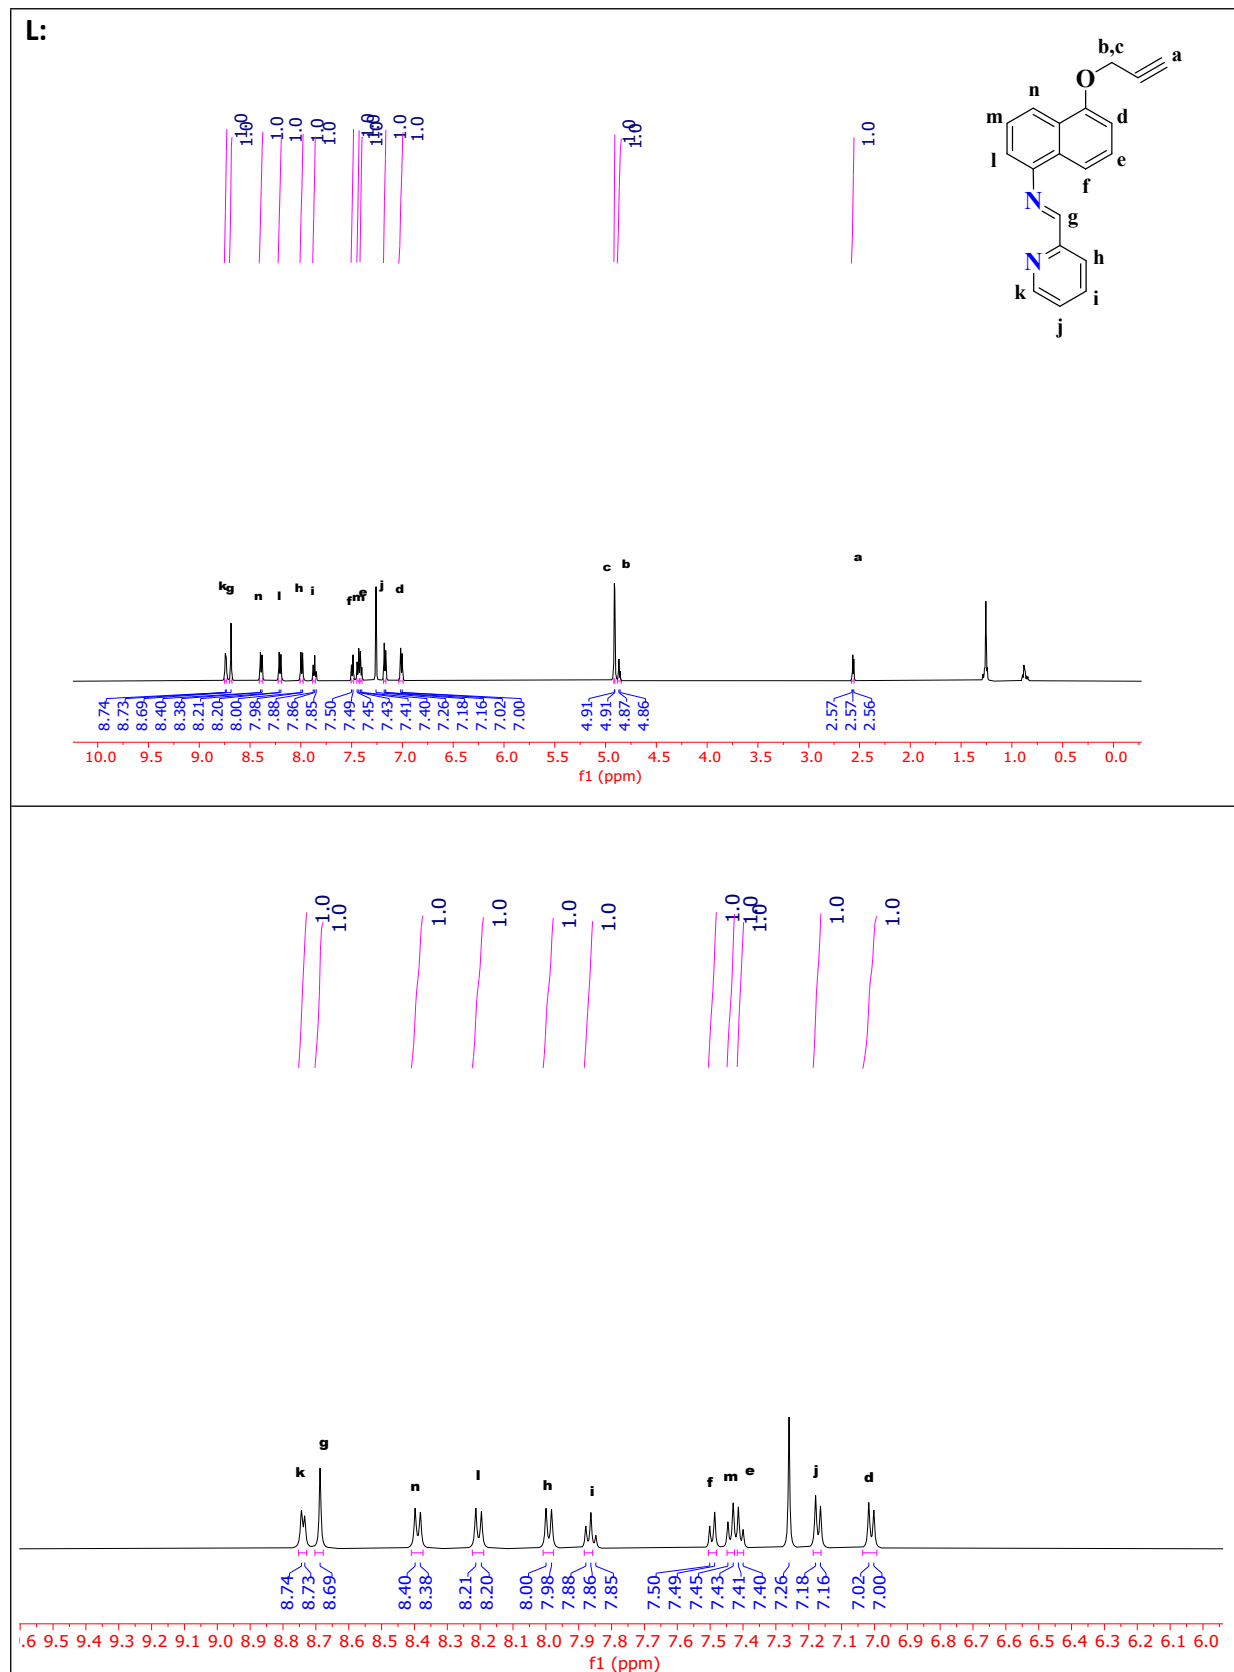

Ir1:

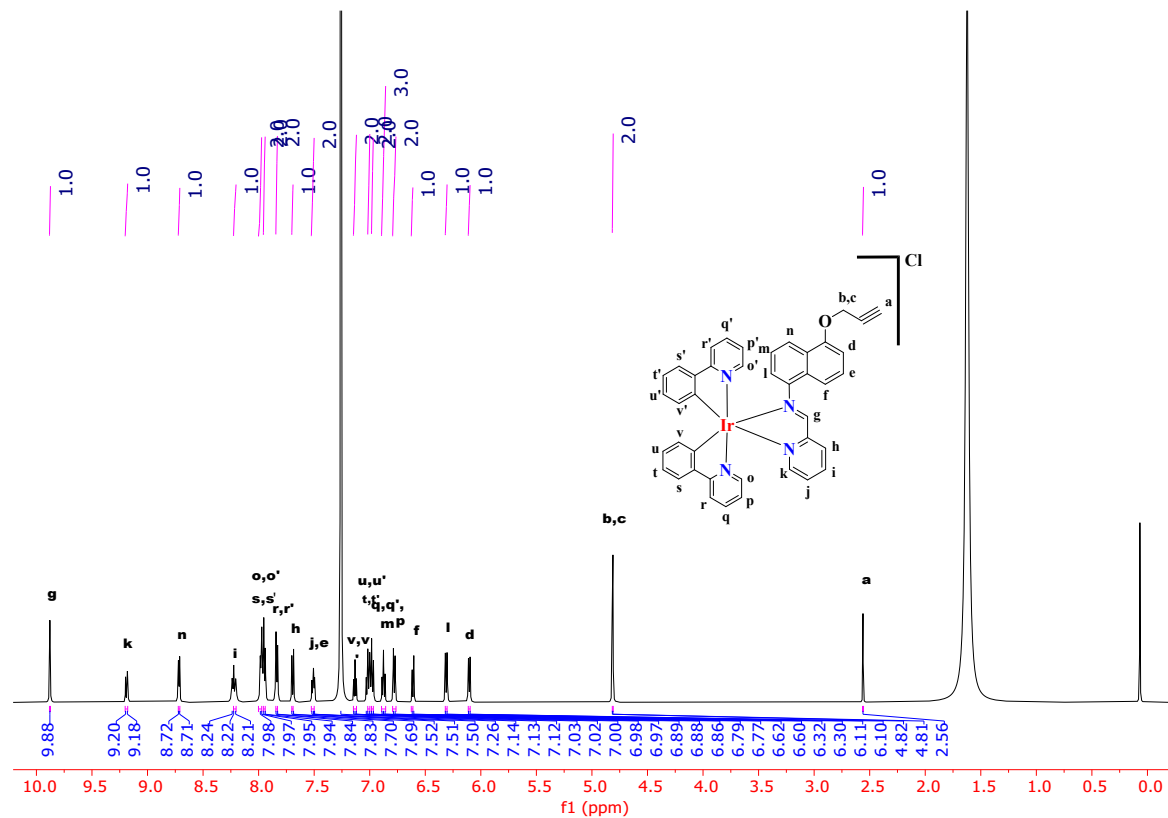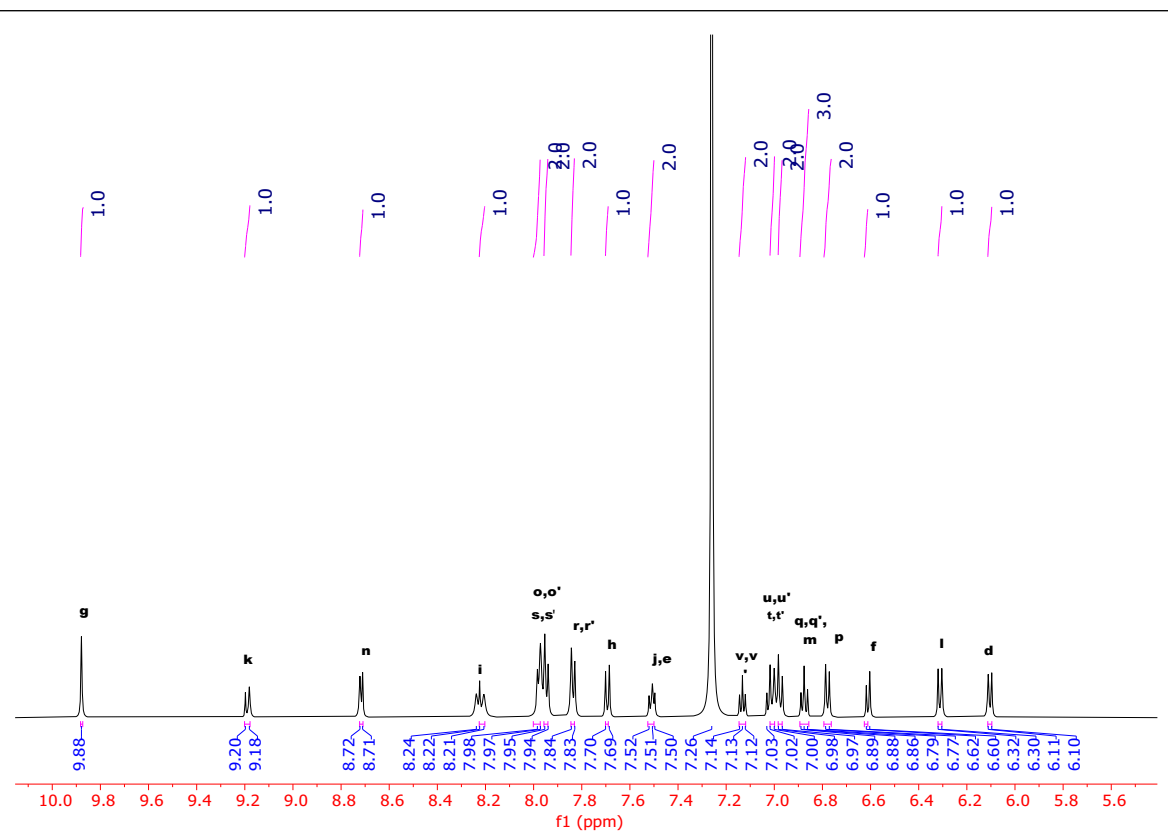

Ir2:

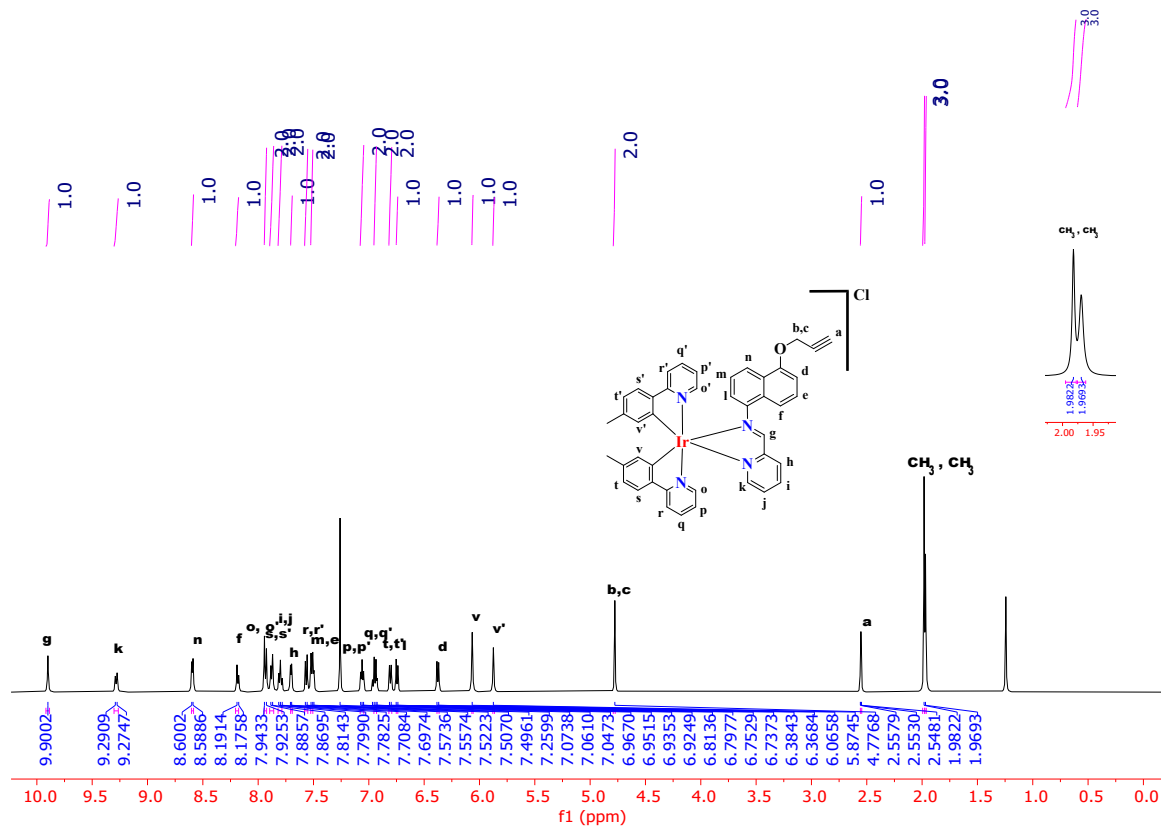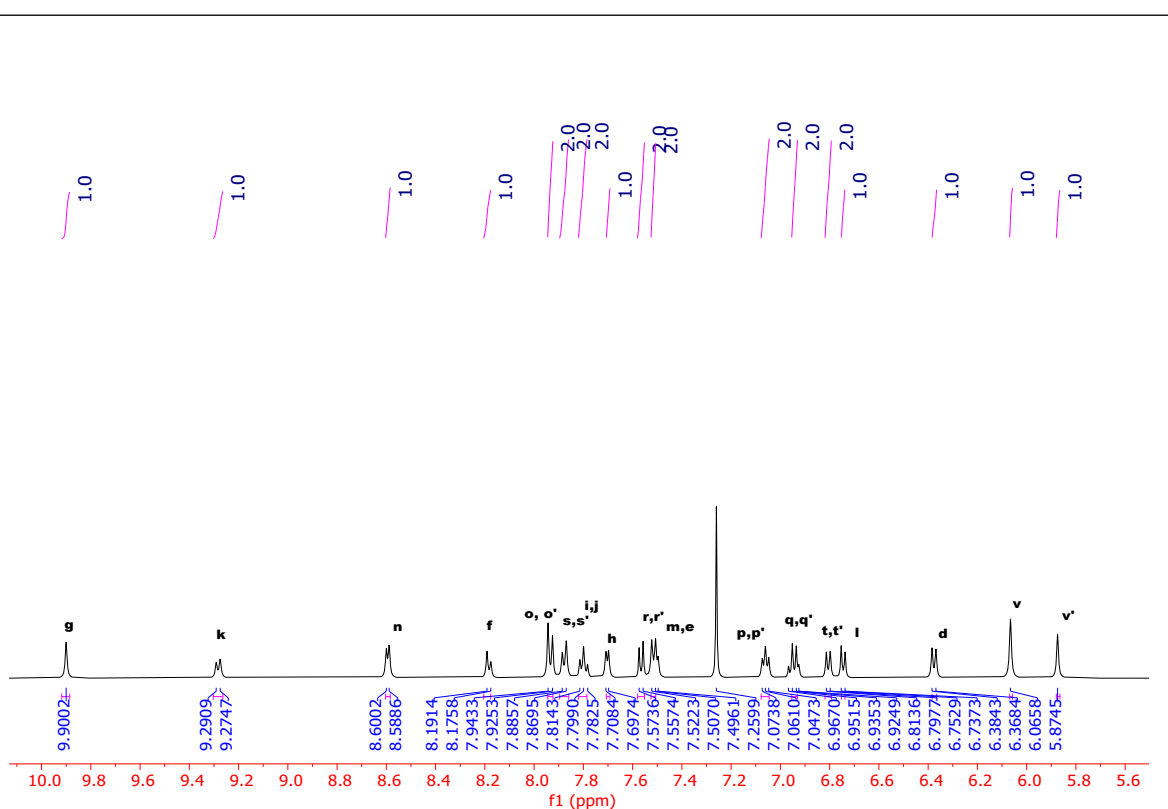

Ir3:

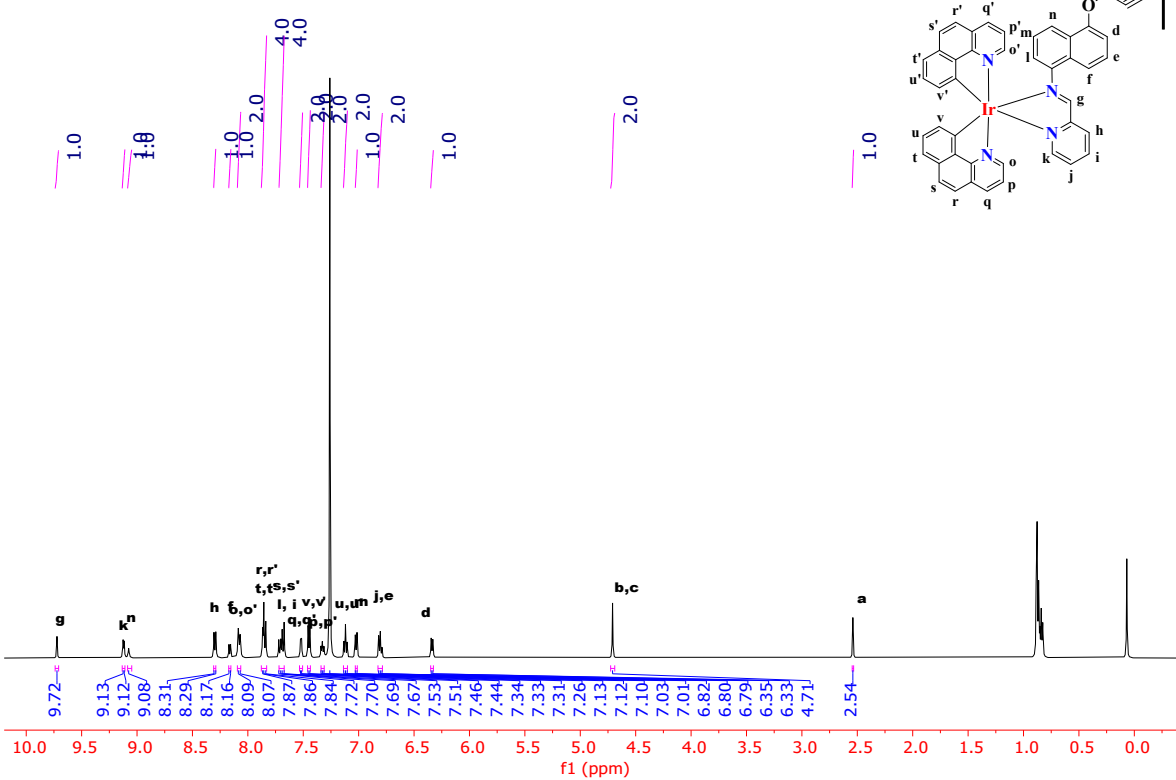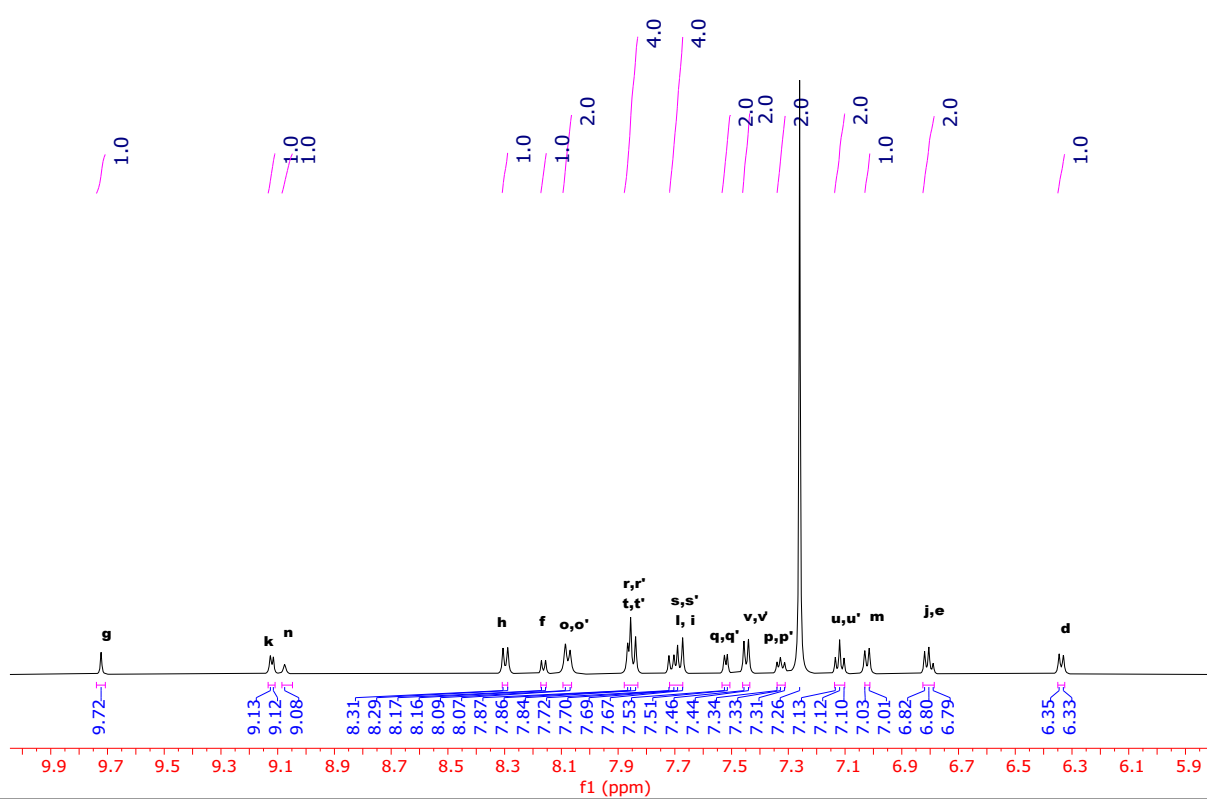

Ir1Pt:

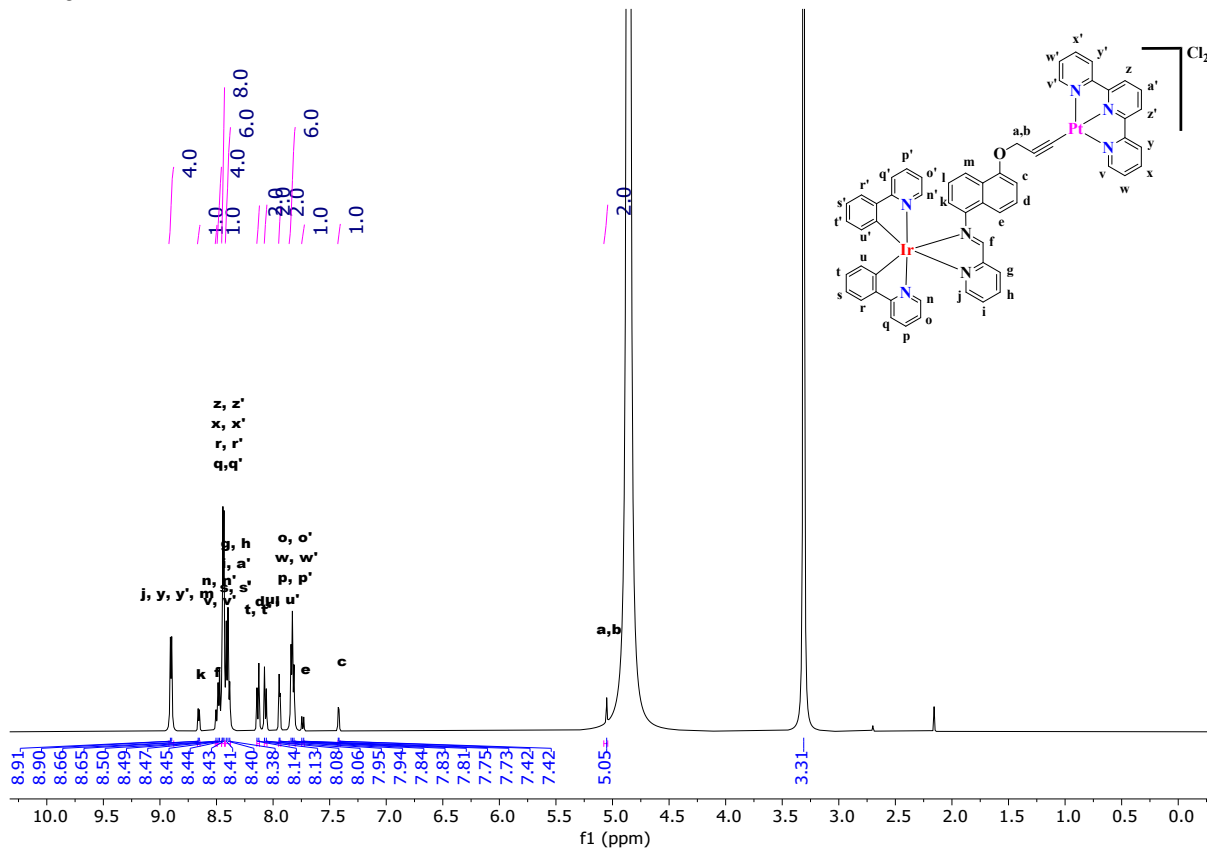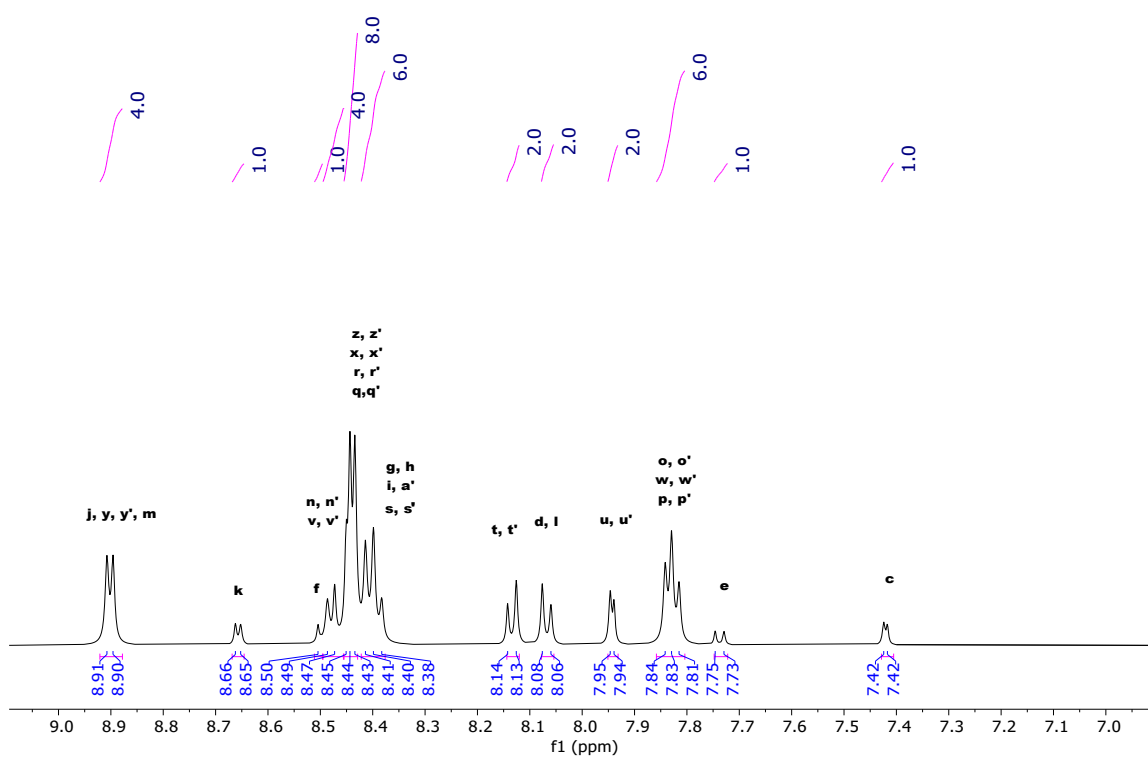

Ir2Pt:

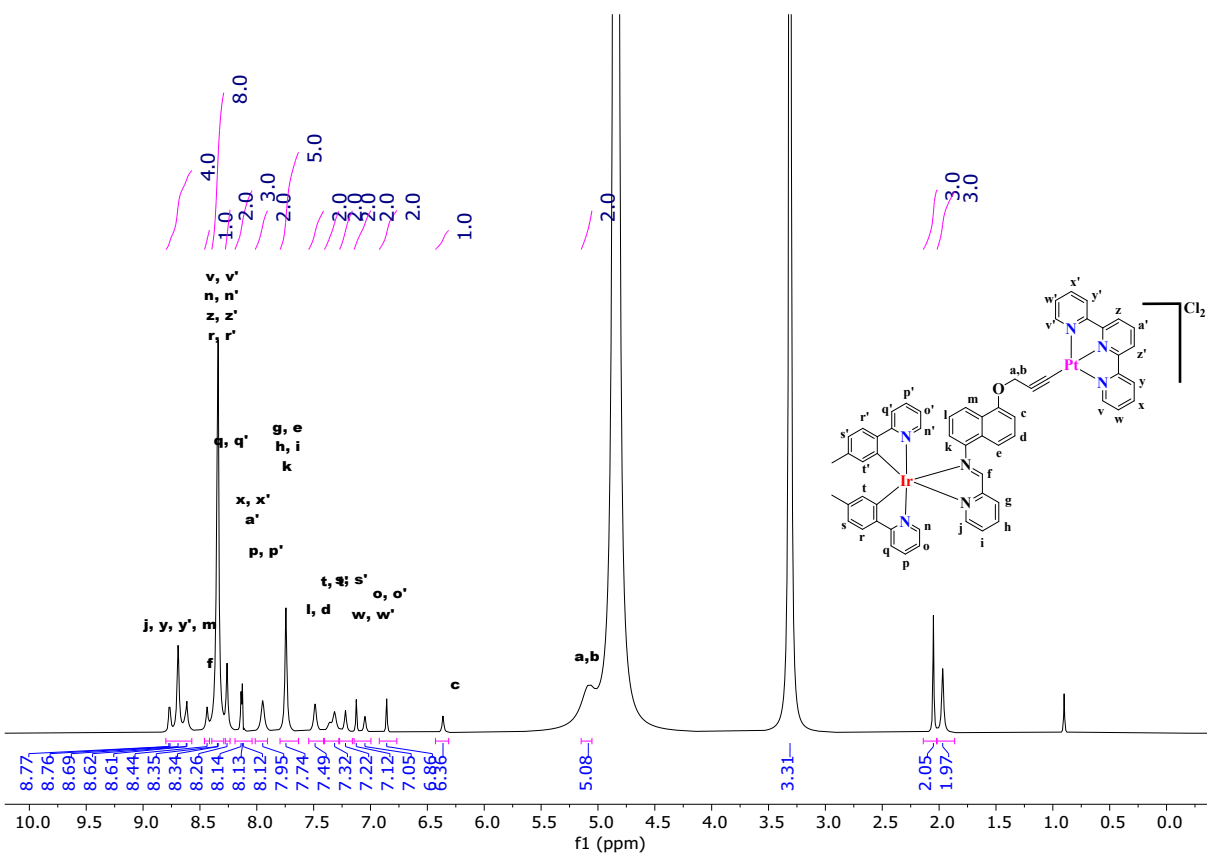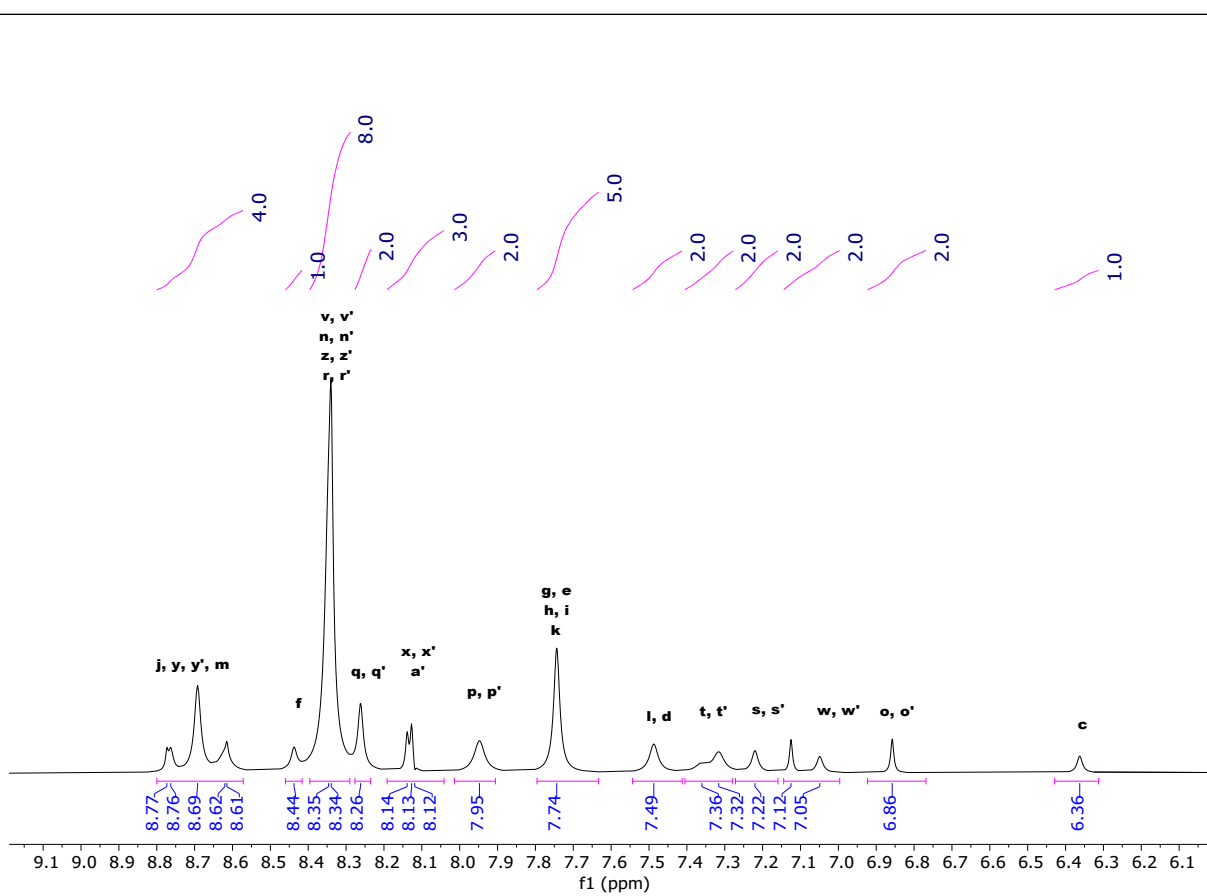

Ir3Pt:

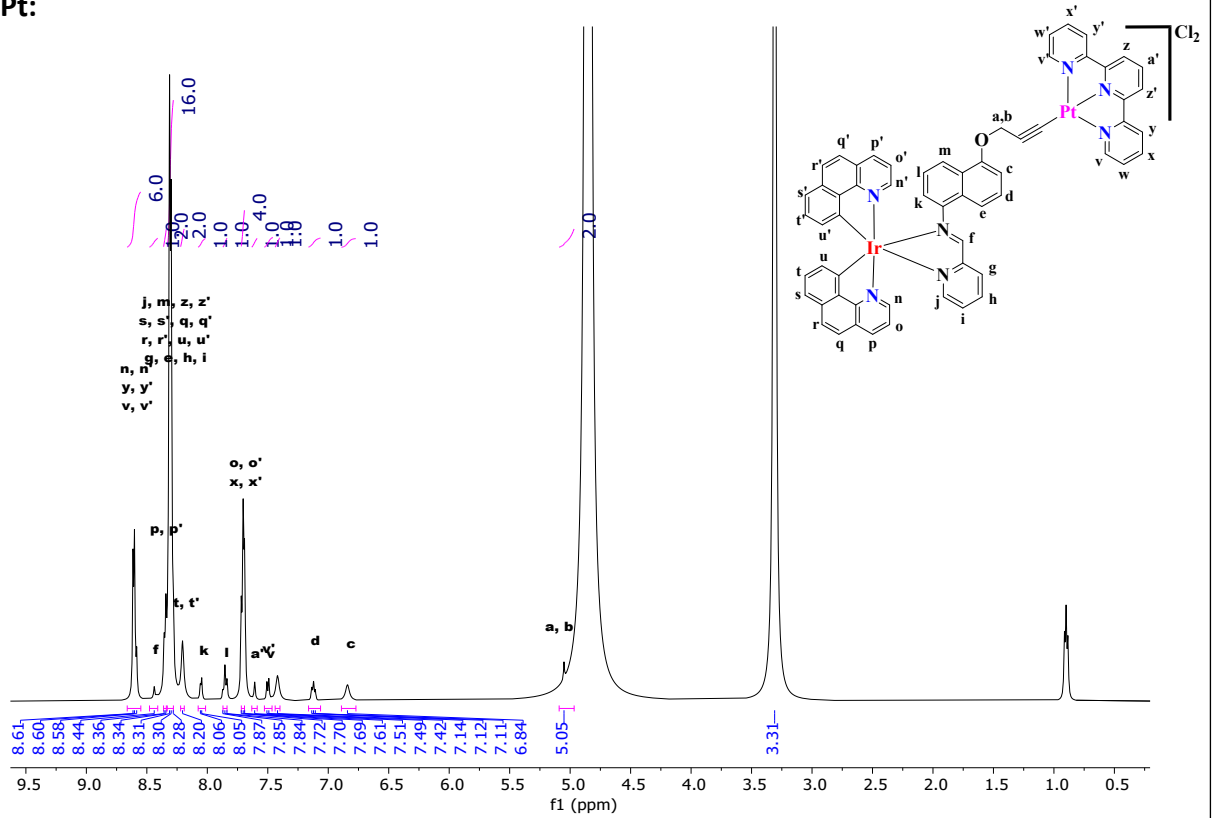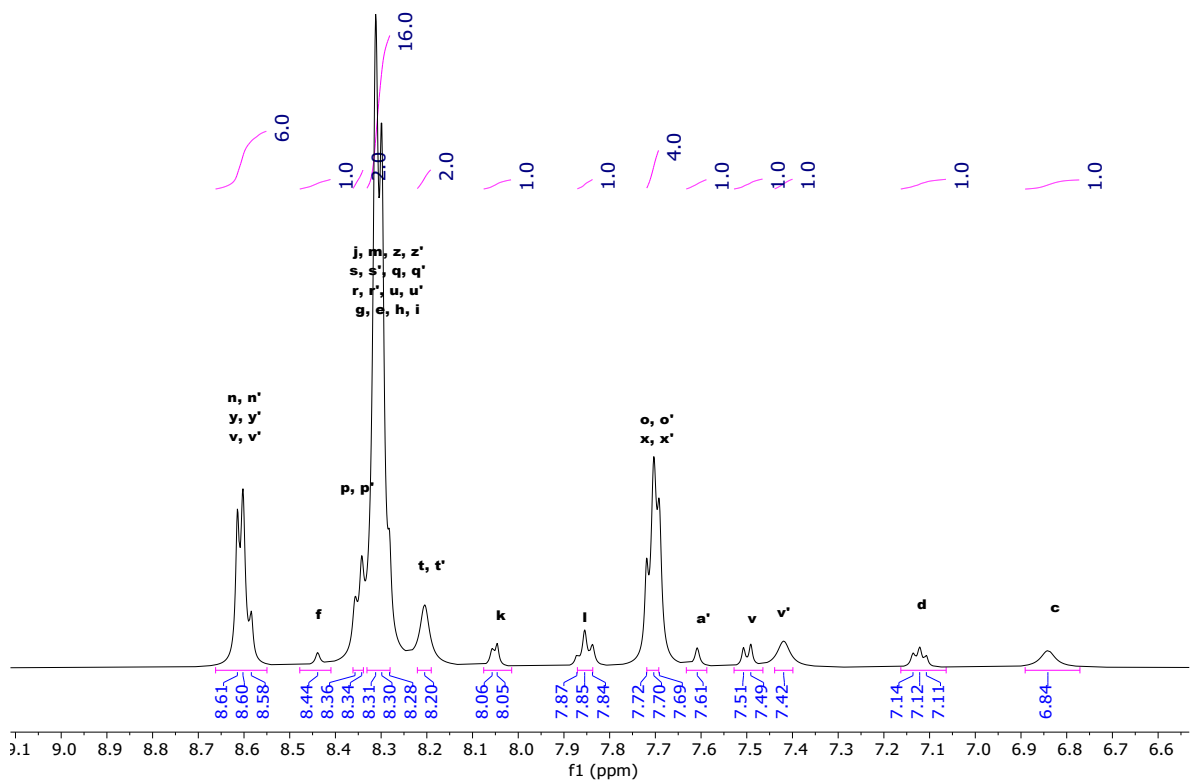

## B. <sup>13</sup>C NMR spectra

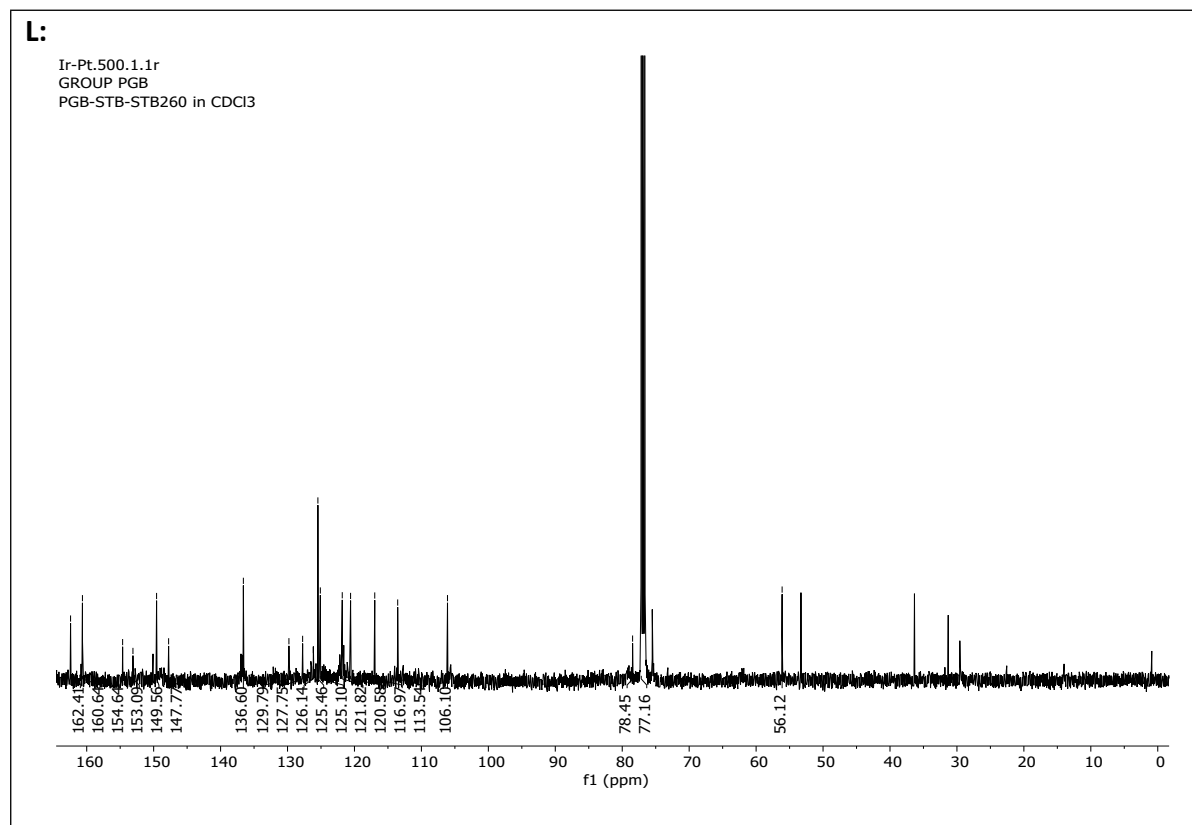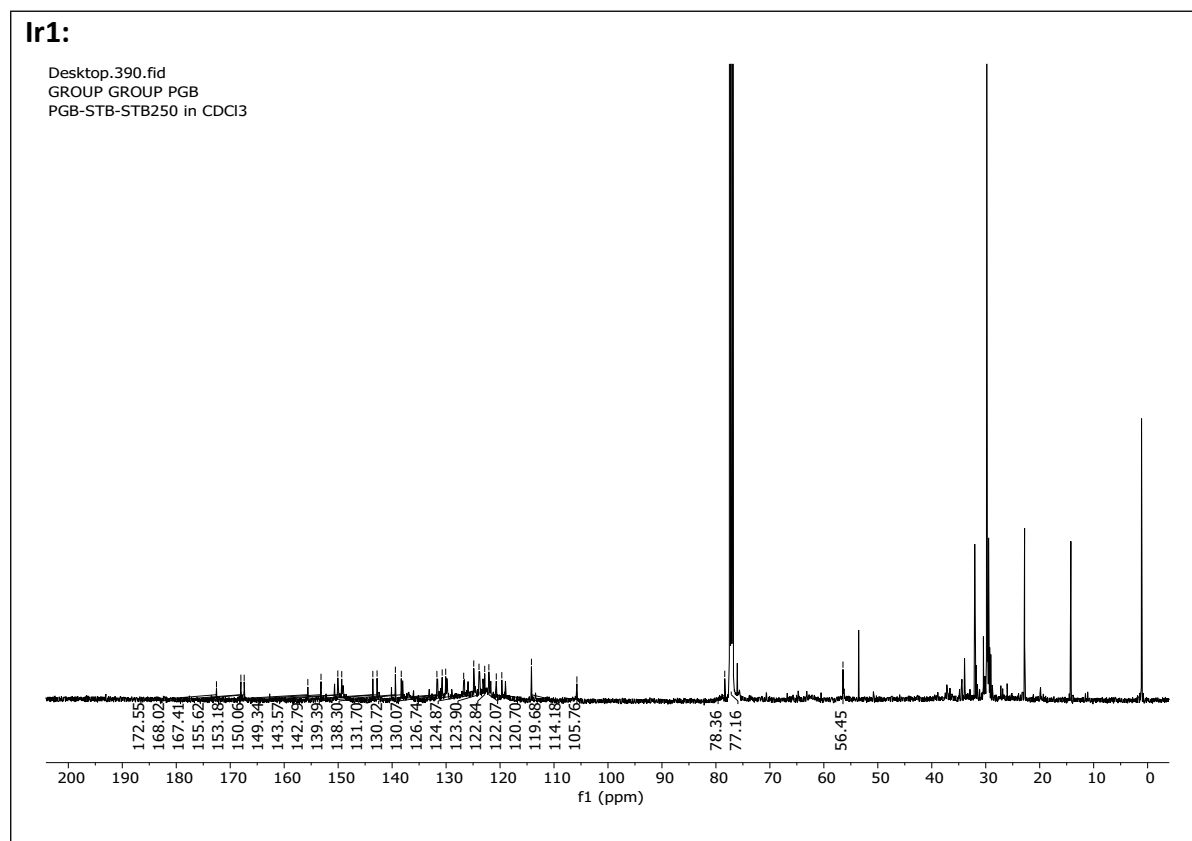



**Ir2:**

Desktop.1010.fid  
GROUP PGB  
PGB-STB-STB199 in CDCl3

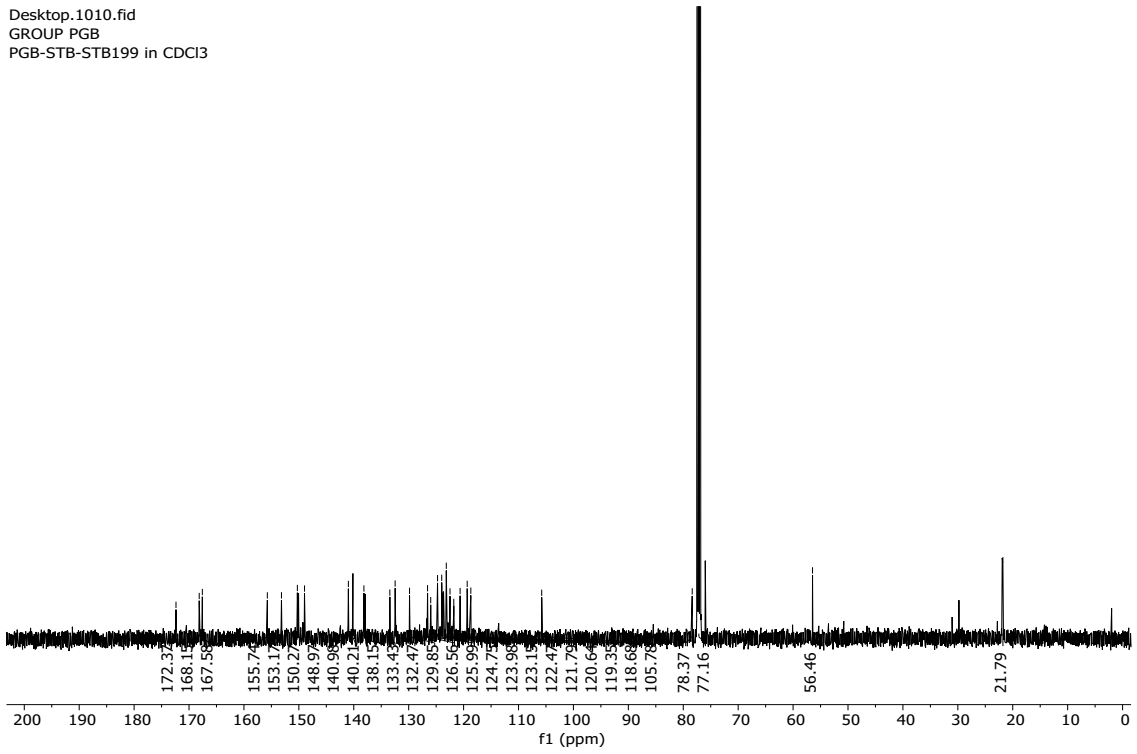

**Ir3:**

Desktop.180.fid  
GROUP PGB  
PGB-STB-STB249 in CDCl3

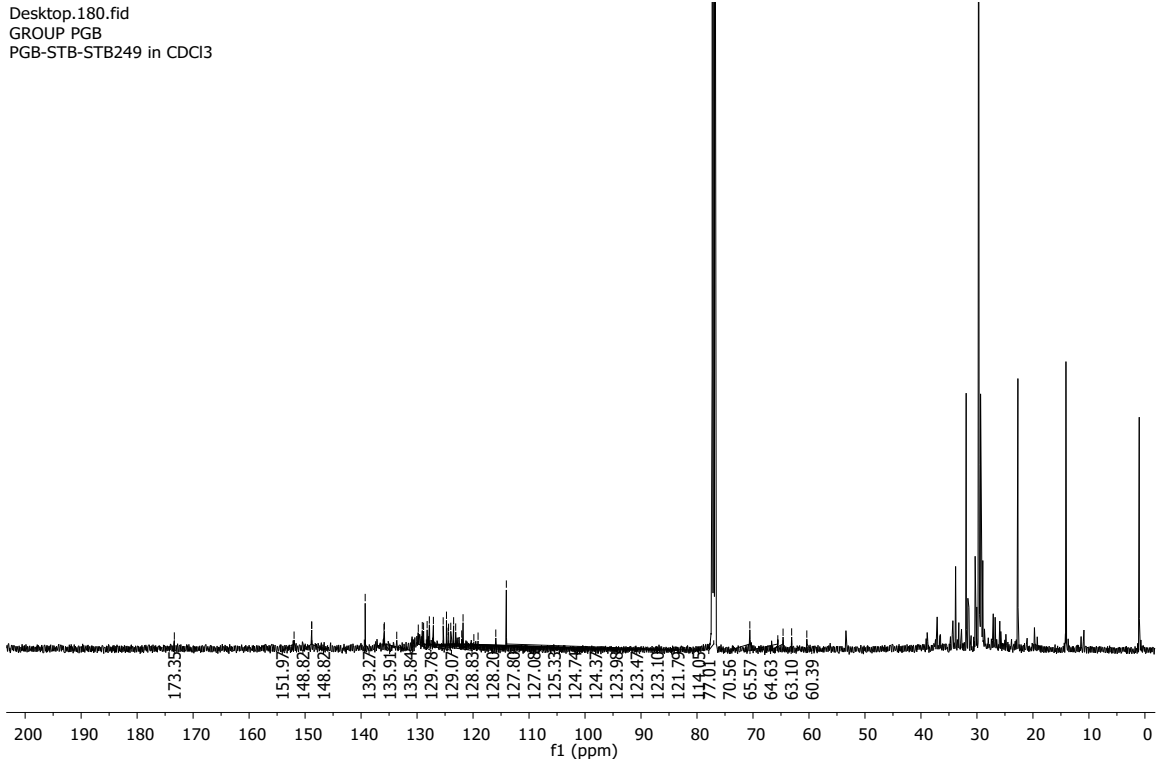

### Ir1Pt:

Desktop  
GROUP PGB  
PGB-STB-STB235 13C in MeOD

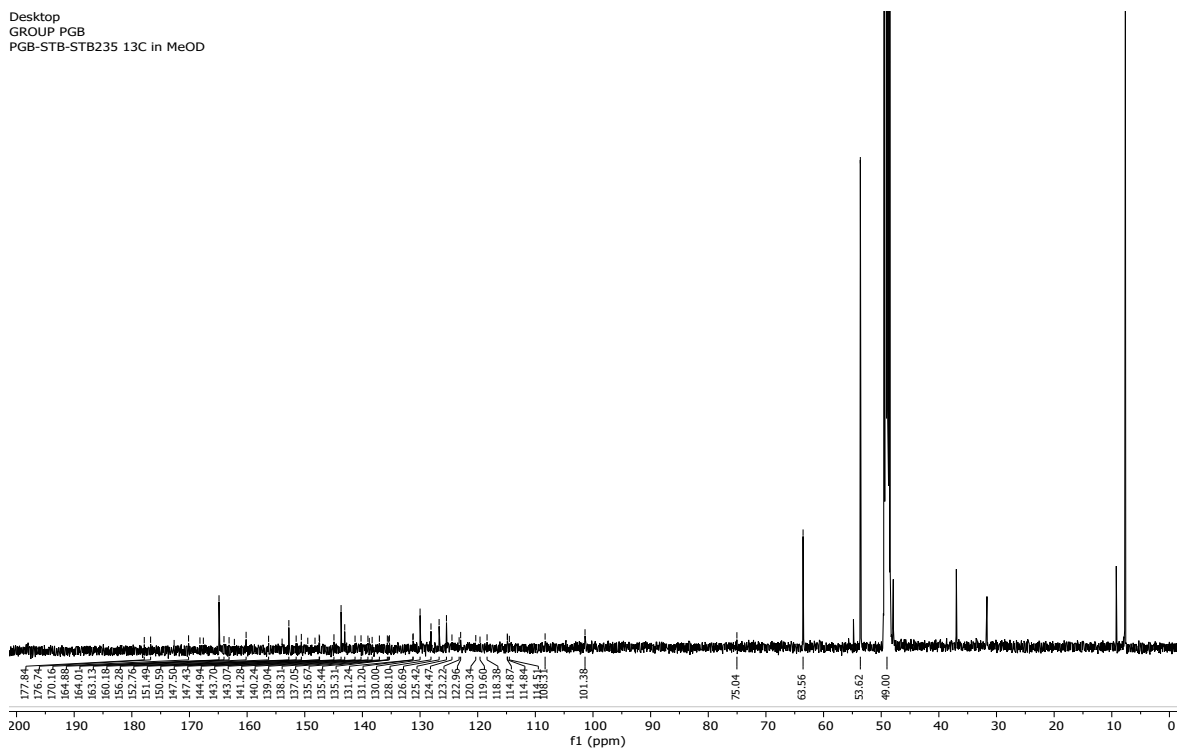

### Ir2Pt:

Desktop.120.fid  
GROUP PGB  
PGB-STB-STB214 in MEOD

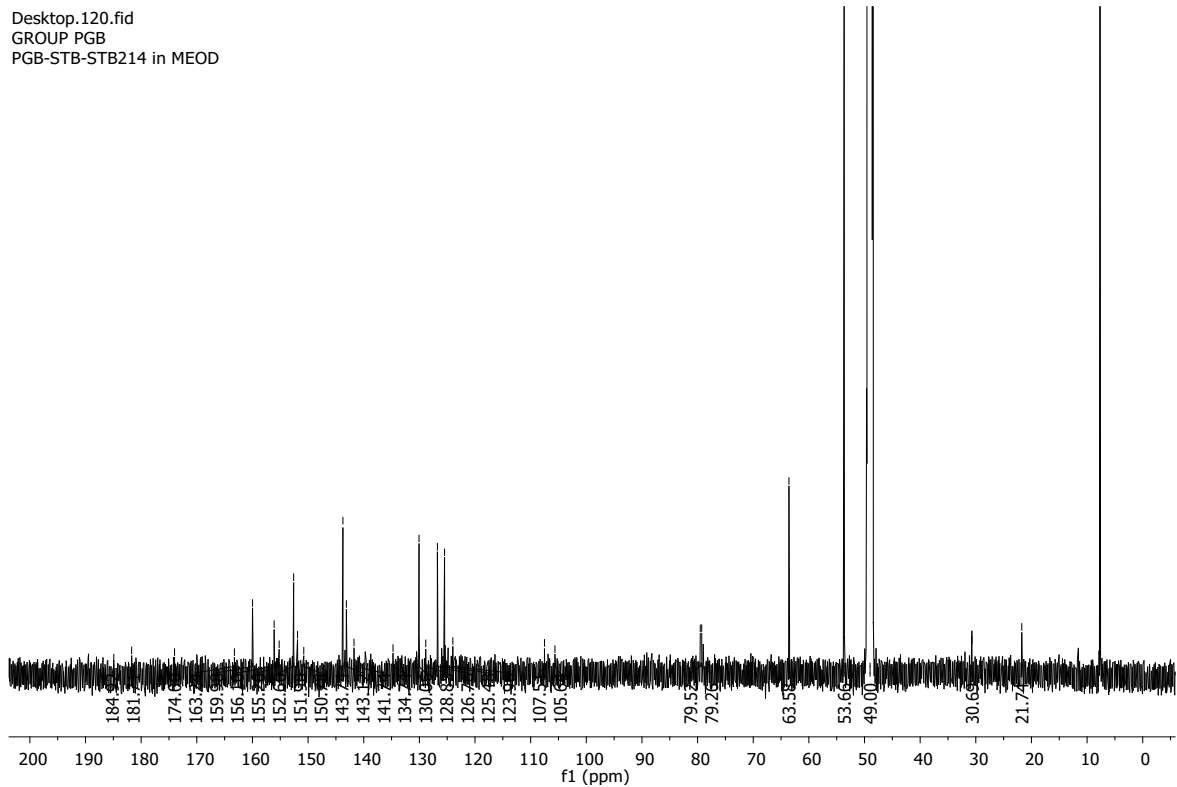

### Ir3Pt

Documents  
GROUP PGB  
PGB-STB-STB238 13C in MEOD

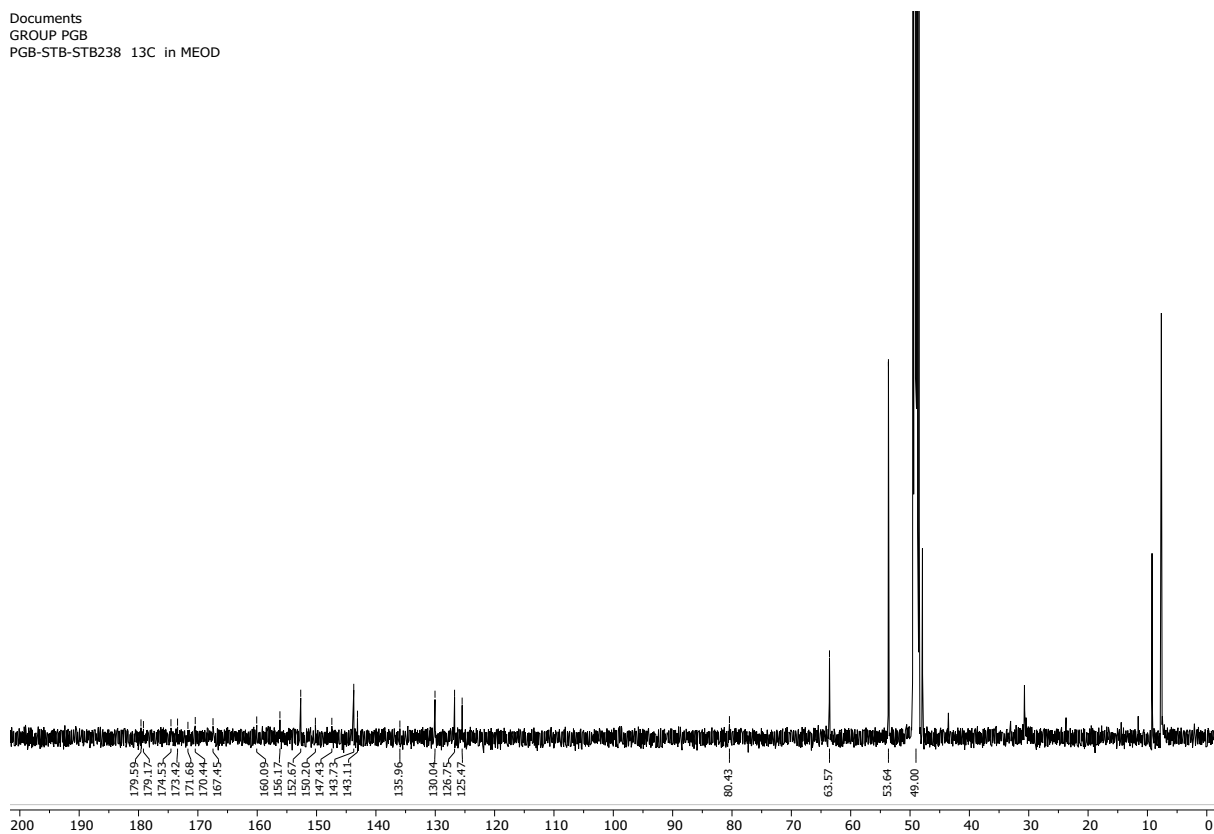

### C. <sup>195</sup>Pt NMR spectra

#### Ir2Pt:

May02-2022  
GROUP PGB  
PGB-STB-STB218 in CD3OD

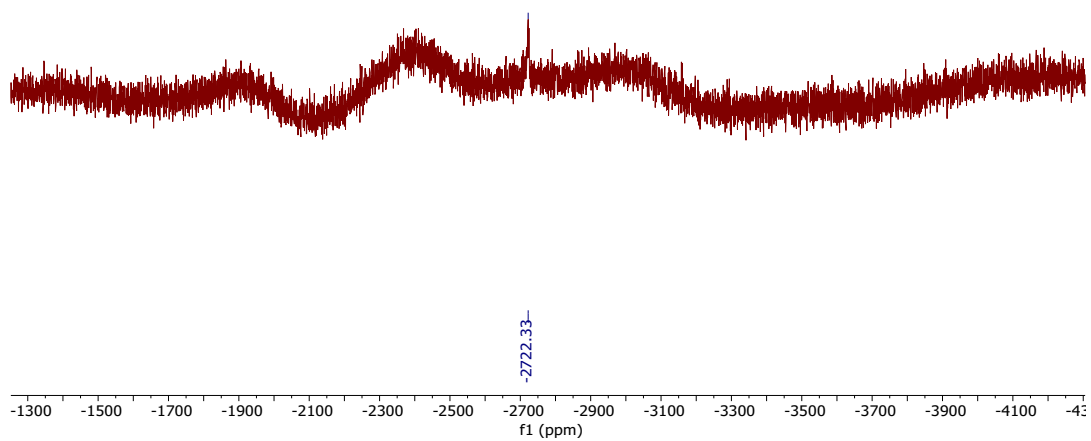

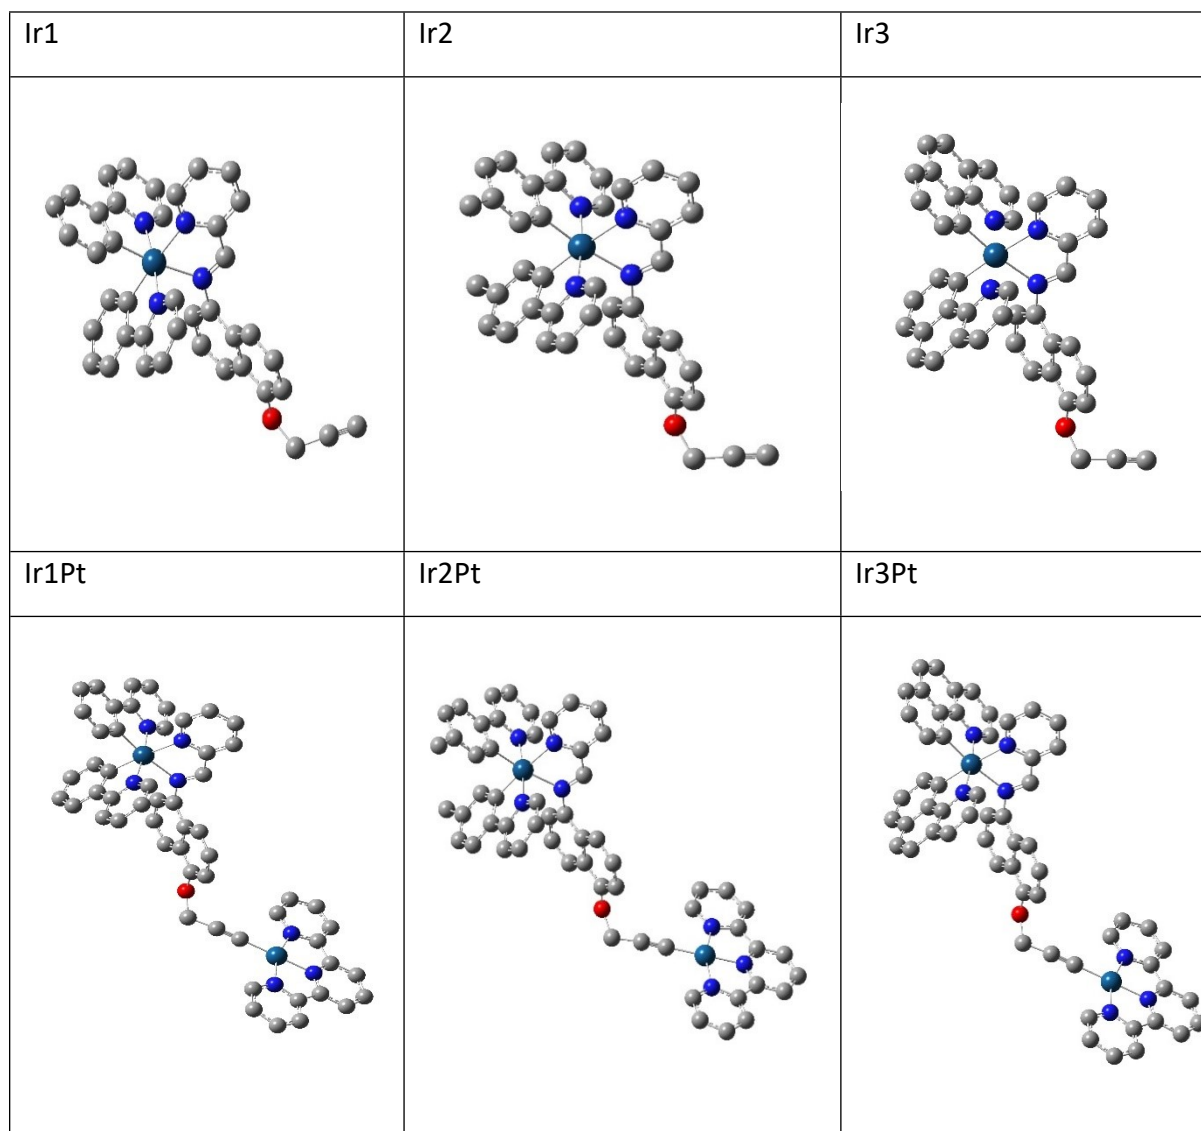

**Figure S3:** Geometry optimized structure of Ir1, Ir2, Ir3, Ir1Pt, Ir2Pt and Ir3Pt

Figure S4: The overlaid absorption spectral profile of experimental and theoretical data

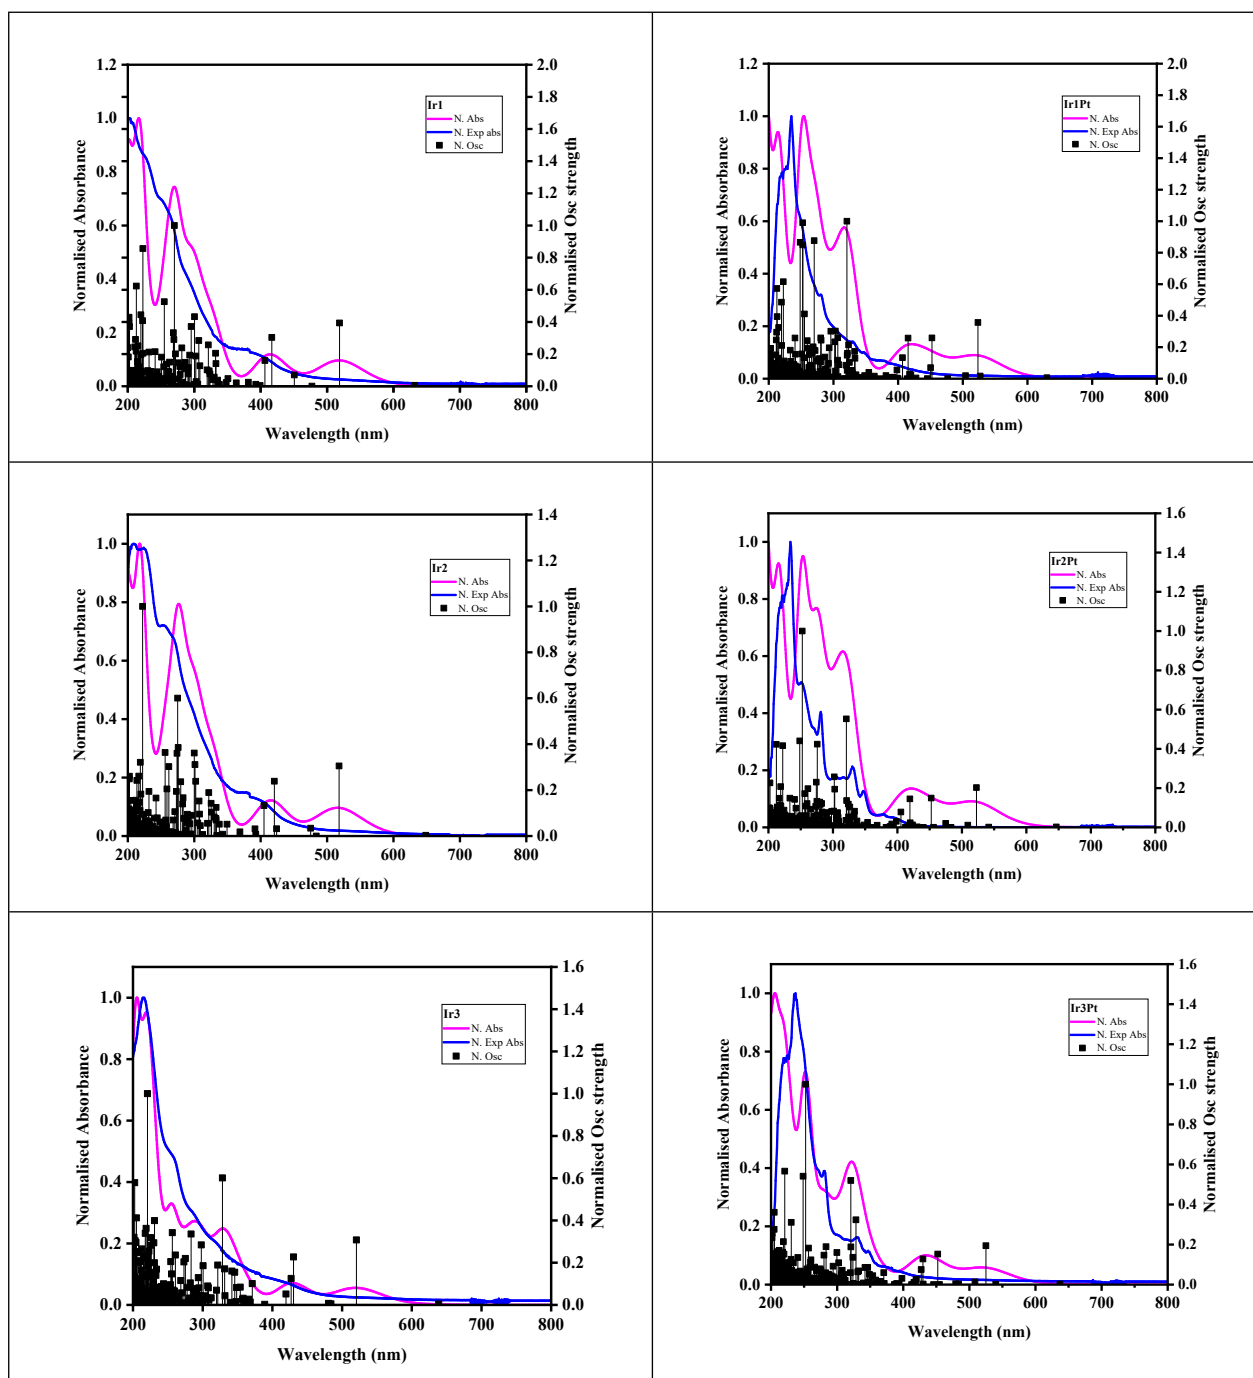

**Table S1:** Frontier orbital diagram of complexes Ir1, Ir2, Ir3, Ir1Pt, Ir2Pt and Ir3Pt

| Absorption |                                                        |                                                                                     |                                                                                       |
|------------|--------------------------------------------------------|-------------------------------------------------------------------------------------|---------------------------------------------------------------------------------------|
| Ir1        | Calculated $\lambda_{\text{Abs}}$ (nm, force constant) |                                                                                     |                                                                                       |
|            | 518.8492<br>f = 0.1111<br>HOMO-1->LUMO                 | 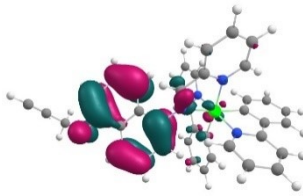   |    |
|            | 450.6713<br>f = 0.0198<br>HOMO-2->LUMO                 |    |    |
|            | 416.7816<br>f = 0.0857<br>HOMO-4->LUMO                 |   |   |
|            | 332.2103<br>f = 0.058<br>HOMO-3->LUMO+1                |  |  |
|            | 300.4803<br>f = 0.1221<br>HOMO-1->LUMO+4               |  |  |
|            | 270.1946<br>f = 0.2821<br>HOMO-2->LUMO+6               |  |  |

| Ir2 | Calculated $\lambda_{Abs}$ (nm, force constant) |                                                                                     |                                                                                       |
|-----|-------------------------------------------------|-------------------------------------------------------------------------------------|---------------------------------------------------------------------------------------|
|     | 518.047<br>f = 0.1099<br>HOMO-1->LUMO           | 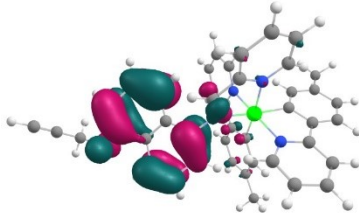   |    |
|     | 420.6419<br>f = 0.086<br>HOMO-5->LUMO           |    |    |
|     | 405.1109<br>f = 0.0478<br>HOMO->LUMO+1          |   |   |
|     | 300.0295<br>f = 0.1301<br>HOMO-1->LUMO+4        |  |  |
|     |                                                 | HOMO-1->LUMO+5                                                                      |    |
|     | 275.1108<br>f = 0.2161<br>HOMO-13->LUMO         |  |  |
|     |                                                 | HOMO-2->LUMO+6                                                                      |    |

|              |                                                 |                                                                                     |                                                                                       |
|--------------|-------------------------------------------------|-------------------------------------------------------------------------------------|---------------------------------------------------------------------------------------|
| <b>Ir3</b>   | Calculated $\lambda_{Abs}$ (nm, force constant) |                                                                                     |                                                                                       |
|              | 520.5483<br>f = 0.103<br>HOMO-1->LUMO           | 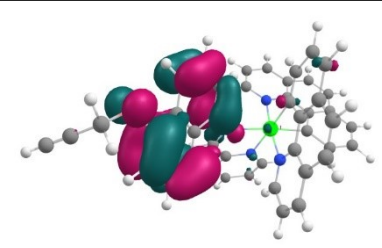   |    |
|              | 426.9722<br>f = 0.042<br>HOMO->L+1              |    |    |
|              | 328.3045<br>f = 0.2012<br>H-4->L+2              |   |   |
|              | H-4->L+1                                        |  |  |
|              | 283.3924<br>f = 0.1124<br>HOMO-13->LUMO         |  |  |
| <b>Ir1Pt</b> | Calculated $\lambda_{Abs}$ (nm, force constant) |                                                                                     |                                                                                       |
|              | 523.4051<br>f = 0.1176<br>HOMO-1->LUMO+1        |  |  |



|              |                                                 |                                                                                     |                                                                                       |
|--------------|-------------------------------------------------|-------------------------------------------------------------------------------------|---------------------------------------------------------------------------------------|
|              | 452.398<br>f = 0.0854<br>HOMO-4->LUMO           | 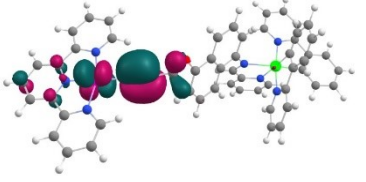   |    |
|              | 415.4409<br>f = 0.085<br>HOMO-5->LUMO+1         |    |    |
|              | 406<br>f = 0.0441<br>HOMO>L+3                   |    |    |
|              | 320.8452<br>f = 0.3298<br>HOMO-13->LUMO         |   |   |
|              | 270.3124<br>f = 0.289<br>HOMO-2->LUMO+10        |  |  |
| <b>Ir2Pt</b> | Calculated $\lambda_{Abs}$ (nm, force constant) |                                                                                     |                                                                                       |
|              | 522.6108<br>f = 0.1205<br>HOMO-1->LUMO+1        |  |  |
|              | 452.5466<br>f = 0.0888<br>HOMO-4->LUMO          |  |  |

|              |                                                        |                                                                                     |                                                                                       |
|--------------|--------------------------------------------------------|-------------------------------------------------------------------------------------|---------------------------------------------------------------------------------------|
|              | 405.5217<br>f = 0.0465<br>HOMO->LUMO+3                 | 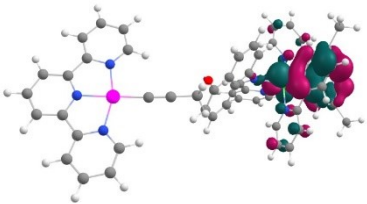   |    |
|              | 353.7655<br>f = 0.0151<br>HOMO-8->LUMO+1               |    |    |
|              | 275.7288<br>f = 0.2522<br>HOMO-2->LUMO+10              |    |    |
|              | HOMO-17->LUMO+1                                        |   |   |
| <b>Ir3Pt</b> | Calculated $\lambda_{\text{Abs}}$ (nm, force constant) |                                                                                     |                                                                                       |
|              | 525.1342<br>f = 0.1131<br>HOMO-1->LUMO+1               |  |  |
|              | 452.2<br>f = 0.0889<br>HOMO-4->LUMO                    |  |  |
|              | 429.7844<br>f = 0.0747<br>HOMO-5->LUMO+1               |  |  |

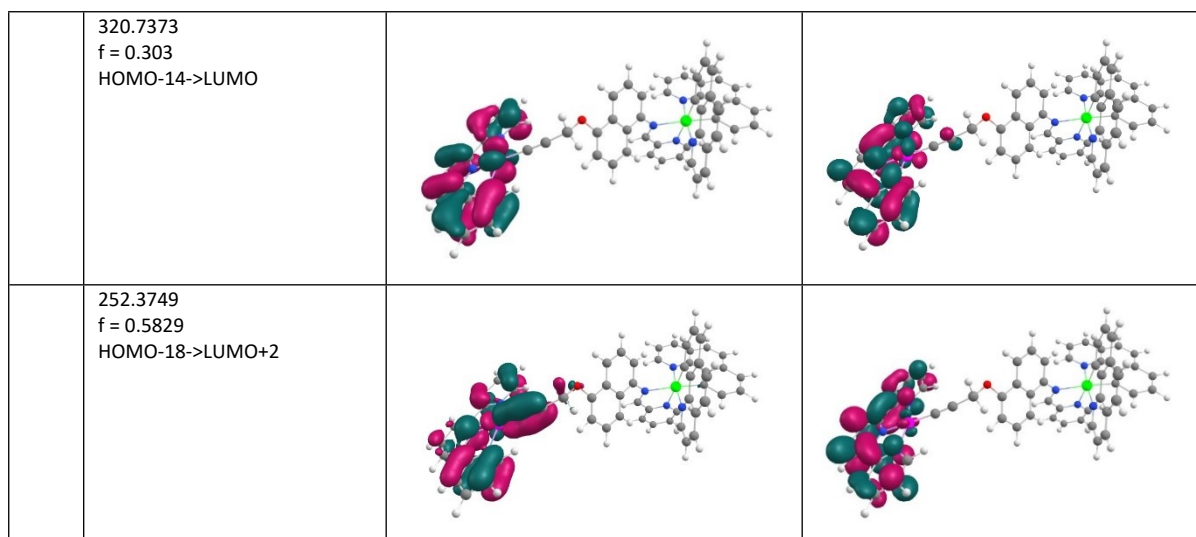

**Figure S5:** Temperature dependent (290 – 80 K) emission spectra of

A: Ir1 -Ir3 in Acetonitrile: MeTHF ( $\lambda_{ex} = 380 - 400$  nm)

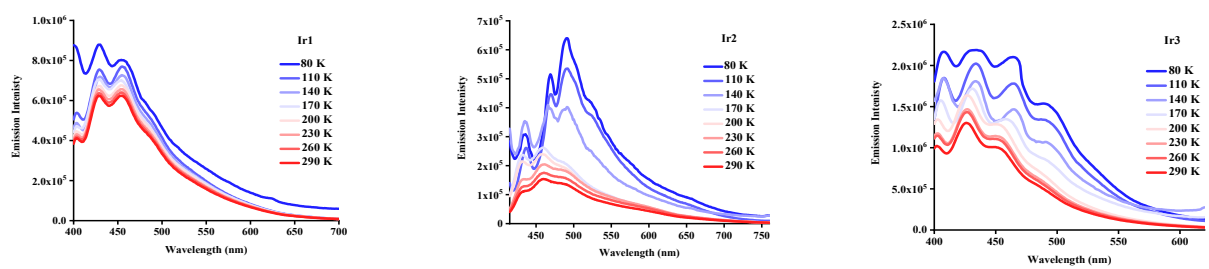

B: Ir1Pt -Ir3Pt in Acetonitrile: MeTHF ( $\lambda_{ex} = 380 - 400$  nm)

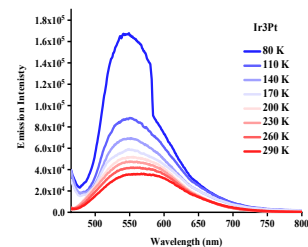

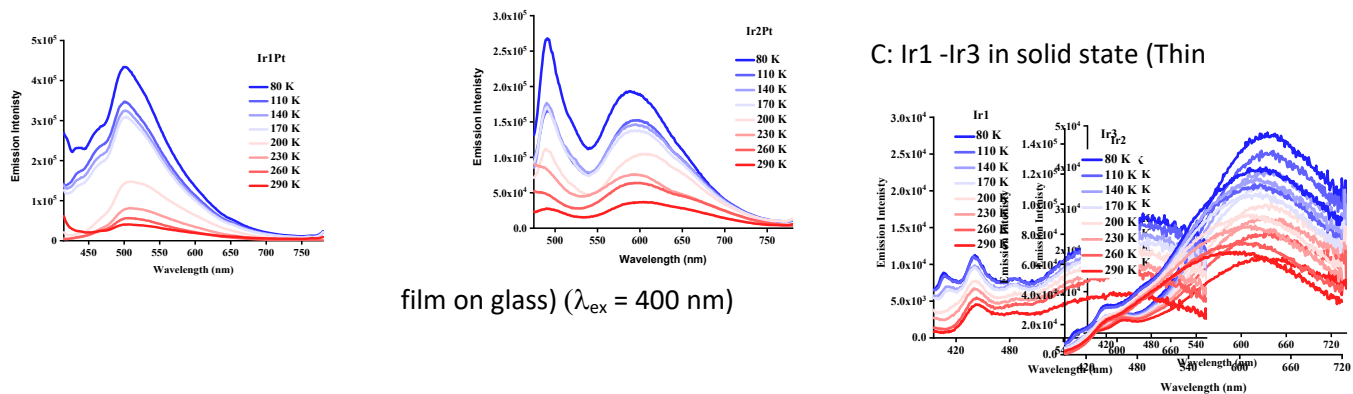

D: Ir1Pt -Ir3Pt in solid state ( $\lambda_{ex} = 500 \text{ nm}$ , Thin film on glass)

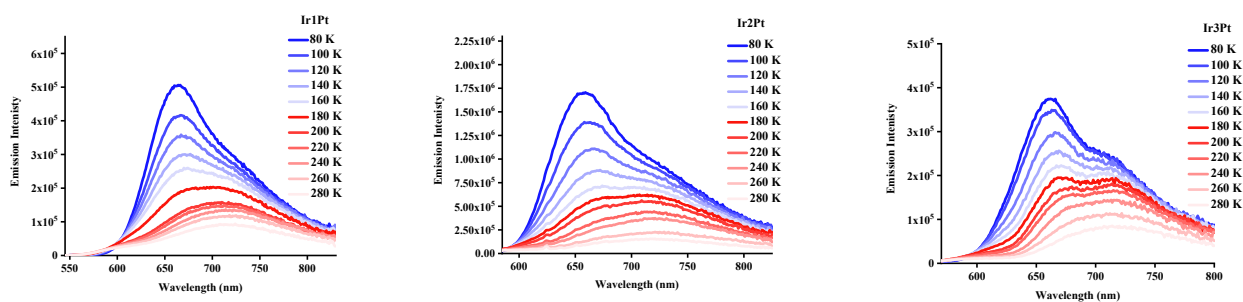

Figure S6: Concentration dependent AIE of Ir1Pt – Ir3Pt

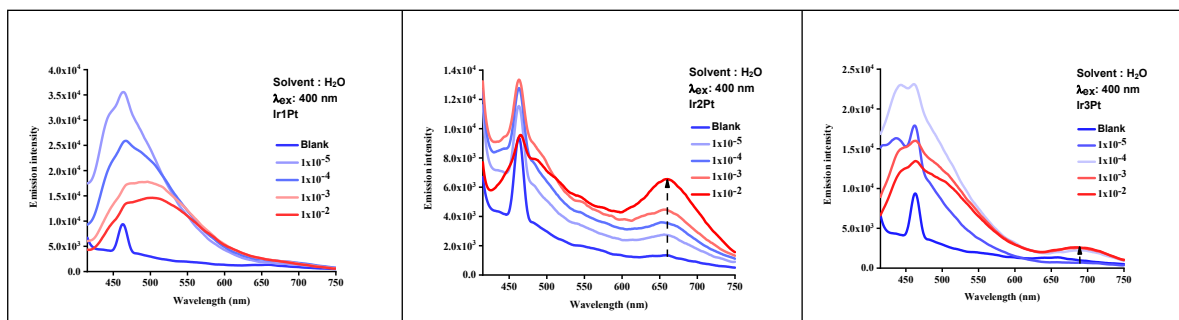

Figure S7: Toxicity of Ir1Pt, Ir2Pt & Ir3Pt on *E. coli* (DH5 $\alpha$ )

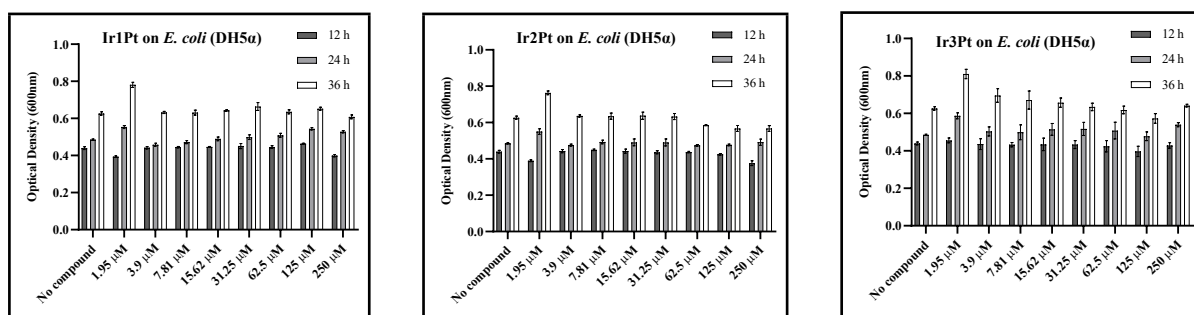

Figure S8: Agar well diffusion assay using A. mononuclear B. dinuclear complexes

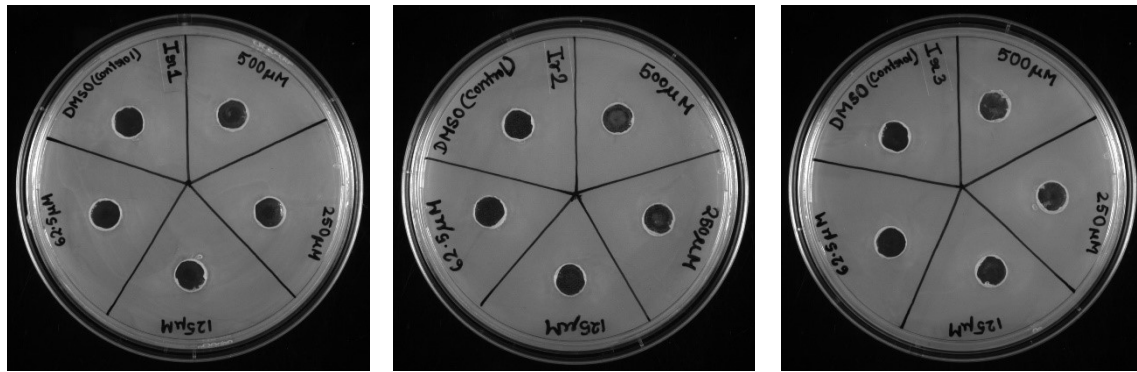

A.

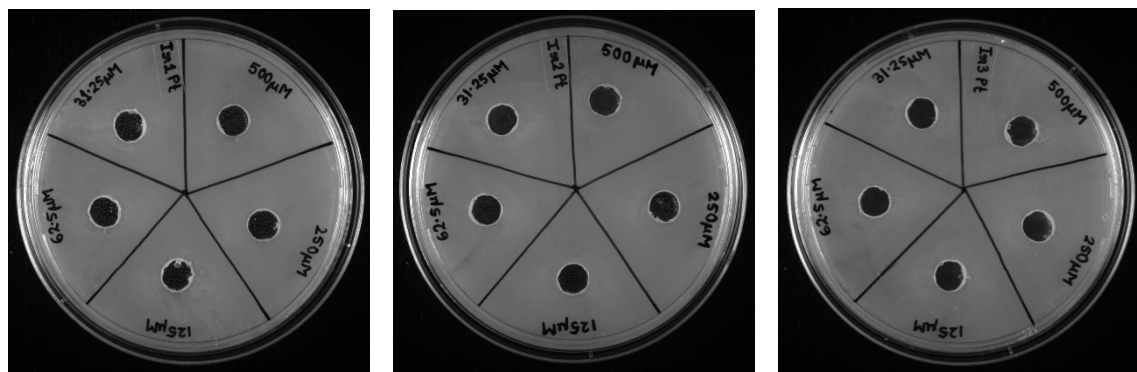

B.
